# Supplementary material for: Genome-Wide Characterization and Analysis of Expression of the Histone Gene Family in Razor Clam, Sinonovacula constricta
Source: MDPI journal article supplement (doi:10.3390/fishes7010005), 2021-12-25
Supplement: s1 [file s1]

**Table S5: Alignment of stem-loop motifs of all histone genes in *S. constricta***

| Gene name/seq position | DIST | Stem-loop           |                   |                                    |
|------------------------|------|---------------------|-------------------|------------------------------------|
|                        |      | <<<<<<. . . .>>>>>> |                   |                                    |
| ScH1.1-1/34-79         | 38   | ACAAA               | GGTCCTTTTCAGGACC  | ATCATATCACCCGAAACGACTTACC          |
| ScH1.1-2/34-79         | 38   | ACAAA               | GGTCCTTTTCAGGACC  | ATCATATCACCCGAAACGACTTACC          |
| ScH1.2/30-75           | 34   | AAAAC               | GGCCCTTTTATAGGGCC | ACCAATTAATCAAGAAGAGATTACC          |
| ScH2A.1-1/31-75        | 34   | A-AAC               | GGCCCTTTTATAGGGCC | ACCAAATTCCTAGAAACAGATTACA          |
| ScH2A.1-2/31-75        | 34   | A-AAC               | GGCCCTTTTATAGGGCC | ACCAATTAATCAAGAAGAGATTACC          |
| ScH2A.1-3/31-75        | 34   | A-AAC               | GGCCCTTTTATAGGGCC | ACCAAATTCCTAGAAACAGATTACA          |
| ScH2A.1-4/31-75        | 34   | A-AAC               | GGCCCTTTTATAGGGCC | ACCAAATTCCTAGAAACAGATTACA          |
| ScH2A.1-5/31-75        | 34   | A-AAC               | GGCCCTTTTATAGGGCC | ACCAATTAATCAAGAAGAGATTACC          |
| ScH2B.1-1/21-66        | 27   | AAAAC               | GGCCCTTTTATAGGGCC | ACAAAACGCCTC <b>GAAAAGA</b> AATACC |
| ScH2B.1-2/21-66        | 27   | AAAAC               | GGCCCTTTTATAGGGCC | ACCAAATTCCTAGAAACAGATTACA          |
| ScH2B.1-3/21-66        | 27   | AAAAC               | GGCCCTTTTATAGGGCC | ACCAAATTCCTAGAAACAGATTACA          |
| ScH2B.2/22-67          | 28   | AAAAC               | GGCCCTTTTATAGGGCC | ACCAAATTCCTAGAAACAGATTACA          |
| ScH3.1-1/24-69         | 28   | ACAAC               | GGCCCTTTTATAGGGCC | ACAACCAACCTCGAAATCTATTACC          |
| ScH3.1-2/23-68         | 27   | ACAAC               | GGCCCTTTTATAGGGCC | ACAACCAACCTCGAAATCTATTACC          |
| ScH3.3/52-95           | 56   | GAACC               | GGTGC-CTCTGGGTCC  | TCAAGCTTGAGAGGTGAAAGGCA            |
| ScH4-1/23-68           | 27   | GAAAC               | GGCCCTTTTATAGGGCC | ACAACCAACCTCGAAATCTATTACC          |
| ScH4-2/23-68           | 27   | GAAAC               | GGCCCTTTTATAGGGCC | ACAAAACGCCTCGAAAAGAAATACC          |
| ScH4-3/23-68           | 27   | GAAAC               | GGCCCTTTTATAGGGCC | ACAAAACGCCTCGAAAAGAAATACC          |
| ScH2A.1-6/30-74        | 33   | A-AAC               | GGCCCTTTTATAGGGCC | ACCAAATAATCAAGAATAGATTACC          |
| ScH3.1-3/24-67         | 28   | ACAAC               | GGCCCTTTTATAGGGCC | ACAAAATTCCTCGAAAAGA--TACC          |
| ScH4-4/23-68           | 27   | GAAAC               | GGCCCTTTTATAGGGCC | ACCAACATCCTAGAAACAGATTACA          |
| ScH1.3-6/38-83         | 42   | ACAAA               | GGTCCTTTTCAGGACC  | ATCAAATAGCACGTAATGAGTTACC          |
| ScH2A.1-18/29-74       | 33   | AAAAC               | GGCCCTTTTATAGGGCC | ACCAAATAATCAAGAATAGATTACC          |
| ScH2B.1-21/22-67       | 28   | AAAAC               | GGCCCTTTTATAGGGCC | ACCAACATCCTAGAAACAGATTACA          |
| ScH3.1-18/24-69        | 28   | ACAAC               | GGCCCTTTTATAGGGCC | ACAACCTCCCTCGAAACATATTACC          |
| ScH4-21/23-66          | 27   | GAAAC               | GGCCCTTTTATAGGGCC | ACAAAATTCCTCGAAAAGA--TACC          |
| ScH1oo/15-52           | 19   | CAGAG               | AGCTGTT-----C     | AATAAATATGCTGTAGAAATAGACA          |
| ScH3.2-2/1-42          | 5    | AAGAT               | AACGC-GTTGACACTG  | CCACTCACATTAACATTGAATA--           |
| ScH2B.4/1-36           | 4    | GTAA-               | -----TTTCTGAGC-   | -CACTTTTCTAAAAAAAAAAAA--           |
| ScH3.1-13/24-69        | 28   | ACAAC               | GGCCCTTTTATAGGGCC | ACAACCTCCCTCGAAACATATTACC          |
| ScH4-17/23-66          | 27   | GAAAC               | GGCCCTTTTATAGGGCC | ACAAAATTCCTCGAAAAGA--TACC          |

|                    |    |       |                   |                            |
|--------------------|----|-------|-------------------|----------------------------|
| ScH2A.1macro/13-56 | 17 | ATTAT | AGTCCATATCATA—C   | ACACATGGAATGAGAAAATATTACA  |
| ScH2A.1-10/30-74   | 33 | A-AAC | GGCCCTTTTTAGGGCC  | ACCAAATAATCAAGAATAGATTACC  |
| ScH2B.1-13/22-67   | 28 | AAAAC | GGCCCTTTTTAGGGCC  | ACCAACATCCTAGAAACAGATTACA  |
| ScH2B.1-14/22-67   | 28 | AAAAC | GGCCCTTTTTAGGGCC  | ACCAACATCCTAGAAACAGATTACA  |
| ScH2B.1-15/22-67   | 28 | AAAAC | GGCCCTTTTTAGGGCC  | ACCAACATCCTAGAAACAGATTACA  |
| ScH3.1-9/24-69     | 28 | ACAAC | GGCCCTTTTTAGGGCC  | ACAACCTCCCTCGAAACATATTACC  |
| ScH3.4/24-67       | 28 | ACAAC | GGCCCTTTTTAGGGCC  | ACAAAATTCTCTCGAAAAGA--TACC |
| ScH1.3-1/38-83     | 42 | ACAAA | GGTCCTTTTCAGGACC  | ATCAAATAGCACGTAATGAGTTACC  |
| ScH1.3-2/38-83     | 42 | ACAAA | GGTCCTTTTCAGGACC  | ATCAAATAGCACGTAATGAGTTACC  |
| ScH2A.1-7/29-74    | 33 | AAAAC | GGCCCTTTTTAGGGCC  | ACCAAATAATCAAGAATAGATTACC  |
| ScH2B.1-4/22-67    | 28 | AAAAC | GGCCCTTTTTAGGGCC  | ACCAACATCCTAGAAACAGATTACA  |
| ScH2B.1-5/22-67    | 28 | AAAAC | GGCCCTTTTTAGGGCC  | ACCAACATCCTAGAAACAGATTACA  |
| ScH2B.1-6/24-69    | 28 | CAAAC | GGCCCTTTTTAGGGCC  | ACCAACATCCTAGAAACAGATTACA  |
| ScH3.1-4/24-69     | 28 | ACAAC | GGCCCTTTTTAGGGCC  | ACAACCTCCCTCGAAACATATTACC  |
| ScH3.1-5/24-69     | 28 | ACAAC | GGCCCTTTTTAGGGCC  | ACAACCTCCCTCGAAACATATTACC  |
| ScH4-5/23-66       | 27 | GAAAC | GGCCCTTTTTAGGGCC  | ACAAAATTCTCTCGAAAAGA--TACC |
| ScH4-6/23-66       | 27 | GAAAC | GGCCCTTTTTAGGGCC  | ACAAAATTCTCTCGAAAAGA--TACC |
| ScH4-7/23-66       | 27 | GAAAC | GGCCCTTTTTAGGGCC  | ACAAAATTCTCTCGAAAAGA--TACC |
| ScH1.0/56-99       | 60 | GCATC | GTCGCTCATTATCGCC  | AC--ATCACCTCATTGCAGAGTACC  |
| ScH1.1-4/34-79     | 38 | ACAAA | GGTCCTTTTCAGGACC  | ATCATATCACCCGAAACGACTTACC  |
| ScH2A.1-11/31-75   | 34 | A-AAC | GGCCCTTTTTAGGGCC  | ACCAAATTCCTAGAAACAGATTACA  |
| ScH2A.1-12/31-75   | 34 | A-AAC | GGCCCTTTTTAGGGCC  | ACCAAATTCCTAGAAACAGATTACA  |
| ScH2A.1-13/30-75   | 34 | AAAAC | GGCCCTTTTTAGGGCC  | ACCAAATTCCTAGAAACAGATTACA  |
| ScH2B.1-16/21-66   | 27 | AAAAC | GGCCCTTTTTAGGGCC  | ACAAAACGCCTCGAAAAGAAATACC  |
| ScH3.1-10/23-68    | 27 | ACAAC | GGCCCTTTTTAGGGCC  | ACAACCAACCTCGAAATCTATTACC  |
| ScH3.1-11/23-68    | 27 | ACAAC | GGCCCTTTTTAGGGCC  | ACAACCAACCTCGAAATCTATTACC  |
| ScH4-14/23-68      | 27 | GAAAC | GGCCCTTTTTAGGGCC  | ACAAAACGCCTCGAAAAGAAATACC  |
| ScH3.2-3/23-68     | 27 | AACGC | GTTCTGTCTATCTATCT | ACTATCTATCTATCTATCTACTATC  |
| ScH3.2-4/91-125    | 95 | CAATC | AGCCCTTTTCAGGGC-  | -----TATGAAGGGACTACT       |
| ScH3.2-5/18-52     | 22 | CTGTC | TGTCTTCTGTCTGTCT  | GCTGTCTGTCTG-----TC        |
| ScH3.1-7/23-68     | 27 | ACAAC | GGCCCTTTTTAGGGCC  | ACAAAACGCCTCGAAAAGAAATACC  |
| ScH3.2-1/37-72     | 41 | ACAAT | AACTTTGGTTAAAGC-  | -----TTATAAACTGGCAGTT      |
| ScH1.3-5/39-84     | 43 | ACAAA | GGTCCTTTTCAGGACC  | ATCAAATAGCACGTAATGAGTTACC  |
| ScH1.3-7/39-84     | 43 | ACAAA | GGTCCTTTTCAGGACC  | ATCAAATAGCACGTAATGAGTTACC  |

|                  |    |       |                   |                           |
|------------------|----|-------|-------------------|---------------------------|
| ScH1.5/58-103    | 62 | GTAAC | ACGTTTTTTTAAAAAC  | AAGAATTCGCCGGAACACACGAGC  |
| ScH2A.1-17/30-75 | 34 | AAAAC | GGCCCTTTTTAGGGCC  | ACCAAATAATCAAGAATAGATTACC |
| ScH2A.1-19/30-75 | 34 | AAAAC | GGCCCTTTTTAGGGCC  | ACCAAATAATCAAGAATAGATTACC |
| ScH2B.1-20/23-68 | 29 | AAAAC | GGCCCTTTTTAGGGCC  | ACCAACATCCTAGAAACAGATTACA |
| ScH2B.1-22/23-68 | 29 | AAAAC | GGCCCTTTTTAGGGCC  | ACCAACATCCTAGAAACAGATTACA |
| ScH3.1-17/25-70  | 29 | ACAAC | GGCCCTTTTTAGGGCC  | ACAACCTCCCTCGAAACATATTACC |
| ScH3.1-19/25-70  | 29 | ACAAC | GGCCCTTTTTAGGGCC  | ACAACCTCCCTCGAAACATATTACC |
| ScH4-20/24-67    | 28 | GAAAC | GGCCCTTTTTAGGGCC  | ACAAAATTCCTCGAAAAGA--TACC |
| ScH4-22/24-67    | 28 | GAAAC | GGCCCTTTTTAGGGCC  | ACAAAATTCCTCGAAAAGA--TACC |
| ScH4-23/24-67    | 28 | GAAAC | GGCCCTTTTTAGGGCC  | ACAAAATTCCTCGAAAAGA--TACC |
| ScH2A.1-15/31-76 | 35 | AAAAC | GGCCCTTTTTAGGGCC  | ACCAAATTCCTAGAAACAGATTACA |
| ScH2Asperm/35-79 | 39 | AAAGC | ATC-CGTGTTATCATC  | CGCAACCATATATAAACGACTGTTC |
| ScH1.1-3/35-80   | 39 | ACAAA | GGTCCTTTTTCAGGACC | ATCATATCACCCGAAACGACTTACC |
| ScH1.4-1/35-80   | 39 | ACAAA | GGTCCTTTTTCAGGACC | ATCATATCACCCGAAACGACTTACC |
| ScH1.4-2/35-80   | 39 | ACAAA | GGTCCTTTTTCAGGACC | ATCATATCACCCGAAACGACTTACC |
| ScH2A.1-8/32-76  | 35 | A-AAC | GGCCCTTTTTAGGGCC  | ACCAATTAATCAAGAAGAGATTACC |
| ScH2A.1-9/32-76  | 35 | A-AAC | GGCCCTTTTTAGGGCC  | ACCAAATTCCTAGAAACAGATTACA |
| ScH2B.1-8/24-69  | 28 | CAAAC | GGCCCTTTTTAGGGCC  | ACCAATTAATCAAGAAGAGATTACC |
| ScH2B.1-9/22-67  | 28 | AAAAC | GGCCCTTTTTAGGGCC  | ACCAAATTCCTAGAAACAGATTACA |
| ScH2B.1-10/22-67 | 28 | AAAAC | GGCCCTTTTTAGGGCC  | ACAAAACGCCTCGAAAAGAAATACC |
| ScH2B.1-11/22-67 | 28 | AAAAC | GGCCCTTTTTAGGGCC  | ACAAAACGCCTCGAAAAGAAATACC |
| ScH2B.1-12/22-67 | 28 | AAAAC | GGCCCTTTTTAGGGCC  | ACCAAATTCCTAGAAACAGATTACA |
| ScH3.1-8/24-69   | 28 | ACAAC | GGCCCTTTTTAGGGCC  | ACAACCAACCTCGAAATCTATTACC |
| ScH4-10/24-69    | 28 | GAAAC | GGCCCTTTTTAGGGCC  | ACAAAACGCCTCGAAAAGAAATACC |
| ScH4-11/24-69    | 28 | GAAAC | GGCCCTTTTTAGGGCC  | ACAACCAACCTCGAAATCTATTACC |
| ScH4-12/24-69    | 28 | GAAAC | GGCCCTTTTTAGGGCC  | ACAAAACGCCTCGAAAAGAAATACC |
| ScH4-13/24-69    | 28 | GAAAC | GGCCCTTTTTAGGGCC  | ACAAAACGCCTCGAAAAGAAATACC |
| ScH3.1-14/25-70  | 29 | ACAAC | GGCCCTTTTTAGGGCC  | ACAACCTCCCTCGAAACATATTACC |
| ScH2A.V/11-41    | 10 | ----- | ---CCTTATCAGGGA-  | -TCAAAATGTACGAACTGAG----- |
| ScH2A.2/30-75    | 34 | AAAAC | GGCCCTTTTTAGGGCC  | ACCAAATAATCAAGAATAGATTACC |
| ScH2B.1-17/23-68 | 29 | AAAAC | GGCCCTTTTTAGGGCC  | ACCAACATCCTAGAAACAGATTACA |
| ScH4-15/24-67    | 28 | GAAAC | GGCCCTTTTTAGGGCC  | ACAAAATTCCTCGAAAAGA--TACC |
| ScH1.3-3/39-84   | 43 | ACAAA | GGTCCTTTTTCAGGACC | ATCAAATAGCACGTAATGAGTTACC |
| ScH2A.1-14/30-75 | 34 | AAAAC | GGCCCTTTTTAGGGCC  | ACCAAATAATCAAGAATAGATTACC |

|                  |    |       |                   |                           |
|------------------|----|-------|-------------------|---------------------------|
| ScH2B.1-18/23-68 | 29 | AAAAC | GGCCCTTTT TAGGGCC | ACCAACATCCTAGAAACAGATTACA |
| ScH3.1-12/25-70  | 29 | ACAAC | GGCCCTTTT TAGGGCC | ACAACCTCCCTCGAAACATATTACC |
| ScH4-16/24-67    | 28 | GAAAC | GGCCCTTTT TAGGGCC | ACAAAATTCCTCGAAAAGA--TACC |
| ScH2B.3/28-73    | 32 | CAAAC | GGCCCTTTT TAGGGCC | ACAAAACGCCTCGAAAAGAAATACC |
| ScH1.3-4/39-84   | 43 | ACAAA | GGTCCTTTT CAGGACC | ATCAAATAGCACGTAATGAGTTACC |
| ScH2A.1-16/30-75 | 34 | AAAAC | GGCCCTTTT TAGGGCC | ACCAAATAATCAAGAATAGATTACC |
| ScH2B.1-19/23-68 | 29 | AAAAC | GGCCCTTTT TAGGGCC | ACCAACATCCTAGAAACAGATTACA |
| ScH3.1-15/25-70  | 29 | ACAAC | GGCCCTTTT TAGGGCC | ACAACCTCCCTCGAAACATATTACC |
| ScH3.1-16/25-70  | 29 | ACAAC | GGCCCTTTT TAGGGCC | ACAACCTCCCTCGAAACATATTACC |
| ScH4-18/24-67    | 28 | GAAAC | GGCCCTTTT TAGGGCC | ACAAAATTCCTCGAAAAGA--TACC |
| ScH4-19/24-67    | 28 | GAAAC | GGCCCTTTT TAGGGCC | ACAAAATTCCTCGAAAAGA--TACC |
| ScH2B.1-7/24-69  | 28 | CAAAC | GGCCCTTTT TAGGGCC | ACAAAACGCCTCGAAAAGAAATACC |
| ScH3.1-6/25-70   | 29 | ACAAC | GGCCCTTTT TAGGGCC | ACAACCAACCTCGAAATCTATTACC |
| ScH4-8/24-69     | 28 | GAAAC | GGCCCTTTT TAGGGCC | ACAAAACGCCTCGAAAAGAAATACC |
| ScH4-9/24-69     | 28 | GAAAC | GGCCCTTTT TAGGGCC | ACAACCAACCTCGAAATCTATTACC |

---

Note: DIST (Distance between stop codon and stem-loop structure). The gray shaded background is the gene without stem-loop structure.
