# Supplementary material for: Genome-Wide Characterization and Analysis of Expression of the Histone Gene Family in Razor Clam, Sinonovacula constricta
Source: MDPI journal article supplement (doi:10.3390/fishes7010005), 2021-12-25
Supplement: s1 [file s1]

Archive with 7 entries (7 files):
- Supplementary Figures.pdf
- Supplementary Table S1.xlsx
- Supplementary Table S2.xlsx
- Supplementary Table S3.xlsx
- Supplementary Table S4.xls
- Supplementary Table S5.pdf
- Supplementary Table S6.xlsx
