# Supplementary material for: Genome-Wide Characterization and Analysis of Expression of the Histone Gene Family in Razor Clam, Sinonovacula constricta
Source: MDPI journal article supplement (doi:10.3390/fishes7010005), 2021-12-25
Supplement: s1 [file s1 › Supplementary Table S1.xlsx]

## Sheet: Sheet1
Table S1: Detail information of razor clam histone genes sequences
Gene ID	Gene name	Scaffold	stard	end	strand	Protein	CDS	nr	kegg	Swissprot	Domains (positions)	ORF(aa)	PI	Mw	Gravy
evm.model.ctg4484.11	ScH1.1-1	ctg4484	15972	16508	+	MADVVAAPAPAKVKKAAKPKKPTTHPKYSEMIAAAVGALKERGGSSRQAILKYIQANYKVGDNVTAINAHLKLALKAGCKSGALKQAKGTGASGSFKLGEVKKAAKKAKKPKAAKPKKAKTPKKKAASAKKAAKPKKAKTPKKAAKPAAKKATKSPKKAKAAKPKKTKTPKKAAAAKK	atggccgacgtcgtagcagcaccagcaccagctaaagttaagaaggctgcaaagcctaaaaagccaacaacccacccaaagtacagcgaaatgatcgctgctgctgttggggccctgaaggagaggggaggctcgtcaaggcaggcaatcctgaagtacatccaggctaactacaaggttggagacaatgtcaccgctatcaacgctcacctgaagcttgccctgaaggcaggttgcaagagtggcgcccttaagcaggctaagggaaccggtgcctctgggtccttcaagcttggagaggtgaagaaggcagcaaagaaggcgaagaagcccaaggcagccaagccaaagaaggccaagacacccaagaagaaggcagcctcagccaagaaagccgcc…	hypothetical protein CAPTEDRAFT_19502 [Capitella teleta]	hypothetical protein; K11275 histone H1/5 (A)	Histone H5 OS=Gallus gallus PE=1 SV=2	H1/H5: 25-99	178	10.77	18.3472	-0.794
evm.model.ctg4484.22	ScH1.1-2	ctg4484	29797	30333	+	MADVVAAPAPAKVKKAAKPKKPTTHPKYSEMIAAAVGALKERGGSSRQAILKYIQANYKVGDNVTAINAHLKLALKAGCKSGALKQAKGTGASGSFKLGEVKKAAKKAKKPKAAKPKKAKTPKKKAASAKKAAKPKKAKTPKKAAKPAAKKATKSPKKAKAAKPKKTKTPKKAAAAKK	atggccgacgtcgtagcagcaccagcaccagctaaagttaagaaggctgcaaagcctaaaaagccaacaacccacccaaagtacagcgaaatgatcgctgctgctgttggggccctgaaggagaggggaggctcgtcaaggcaggcaatcctgaagtacatccaggctaactacaaggttggagacaatgtcaccgctatcaacgctcacctgaagcttgccctgaaggcaggttgcaagagtggcgcccttaagcaggctaagggaaccggtgcctctgggtccttcaagcttggagaggtgaagaaggcagcaaagaaggcgaagaagcccaaggcagccaagccaaagaaggccaagacacccaagaagaaggcagcctcagccaagaaagccgcc…	hypothetical protein CAPTEDRAFT_19502 [Capitella teleta]	hypothetical protein; K11275 histone H1/5 (A)	Histone H5 OS=Gallus gallus PE=1 SV=2	H1/H5: 25-99	178	10.77	18.3472	-0.794
evm.model.ctg6665.26	ScH1.1-3	ctg6665	40200	40736	-	MADVVAAPAPAKVKKAAKPKKPTTHPKYSEMIAAAVGALKERGGSSRQAILKYIQANYKVGDNVTAINAHLKLALKAGCKSGALKQAKGTGASGSFKLGEVKKAAKKAKKPKAAKPKKAKTPKKKAASAKKAAKPKKAKTPKKAAKPAAKKATKSPKKAKAAKPKKTKTPKKAAAAKK	atggccgacgtcgtagcagcaccagcaccagctaaagttaagaaggctgcaaagcctaaaaagccaacaacccacccaaagtacagcgaaatgatcgctgctgctgttggggccctgaaggagaggggaggctcgtcaaggcaggcaatcctgaagtacatccaggctaactacaaggttggagacaatgtcaccgctatcaacgctcacctgaagcttgccctgaaggcaggttgcaagagtggcgcccttaagcaggctaagggaaccggtgcctctgggtccttcaagcttggagaggtgaagaaggcagcaaagaaggcgaagaagcccaaggcagccaagccaaagaaggccaagacacccaagaagaaggcagcctcagccaagaaagccgcc…	hypothetical protein CAPTEDRAFT_19502 [Capitella teleta]	hypothetical protein; K11275 histone H1/5 (A)	Histone H5 OS=Gallus gallus PE=1 SV=2	H1/H5: 25-99	178	10.77	18.3472	-0.794
evm.model.ctg7342.6	ScH1.1-4	ctg7342	11235	11771	+	MADVVAAPAPAKVKKAAKPKKPTTHPKYSEMIAAAVGALKERGGSSRQAILKYIQANYKVGDNVTAINAHLKLALKAGCKSGALKQAKGTGASGSFKLGEVKKAAKKAKKPKAAKPKKAKTPKKKAASAKKAAKPKKAKTPKKAAKPAAKKATKSPKKAKAAKPKKTKTPKKAAAAKK	atggccgacgtcgtagcagcaccagcaccagctaaagttaagaaggctgcaaagcctaaaaagccaacaacccacccaaagtacagcgaaatgatcgctgctgctgttggggccctgaaggagaggggaggctcgtcaaggcaggcaatcctgaagtacatccaggctaactacaaggttggagacaatgtcaccgctatcaacgctcacctgaagcttgccctgaaggcaggttgcaagagtggcgcccttaagcaggctaagggaaccggtgcctctgggtccttcaagcttggagaggtgaagaaggcagcaaagaaggcgaagaagcccaaggcagccaagccaaagaaggccaagacacccaagaagaaggcagcctcagccaagaaagccgcc…	hypothetical protein CAPTEDRAFT_19502 [Capitella teleta]	hypothetical protein; K11275 histone H1/5 (A)	Histone H5 OS=Gallus gallus PE=1 SV=2	H1/H5: 25-99	178	10.77	18.3472	-0.794
evm.model.ctg4484.20	ScH1.2	ctg4484	28113	28631	+	MADVVAAPAPAKVKKAAKPKKPTTHPKYSEMIAAAVGALKERGGSSRQAILKYIQANYKVGDNVTAINAHLKLALKAGCKSGALKQAKGTGASGSFKLGEVKKAAKKAKKPKAAKPKKAKTPKKKAASAKKAAKPKKAKTPKKAAKPAAKKATKSPKKAKAAKPKKTQKAGK	atggccgacgtcgtagcagcaccagcaccagctaaagttaagaaggctgcaaagcctaaaaagccaacaacccacccaaagtacagcgaaatgatcgctgctgctgttggggccctgaaggagaggggaggctcgtcaaggcaggcaatcctgaagtacatccaggctaactacaaggttggagacaatgtcaccgctatcaacgctcacctgaagcttgccctgaaggcaggttgcaagagtggcgcccttaagcaggctaagggaaccggtgcctctgggtccttcaagcttggagaggtgaagaaggcagcaaagaaggcgaagaagcccaaggcagccaagccaaagaaggccaagacacccaagaagaaggcagcctcagccaagaaagccgcc…	hypothetical protein CAPTEDRAFT_19502 [Capitella teleta]	hypothetical protein; K11275 histone H1/5 (A)	Histone H5 OS=Gallus gallus PE=1 SV=2	H1/H5: 25-99	172	10.74	17.7364	-0.794
evm.model.ctg5605.4	ScH1.3-1	ctg5605	5021	5599	+	MADVVAPAPAKVKKASKPKKPASHPKYSEMIAAAVGALKERGGSSRQAILKYIQANYKVGDNLTAINAHLKLALKAGCKSGALKQAKGTGASGSFKLGEVKKAAKKAKKPKAAKPKKAKTPKKKVAKKPAAKKTPSKKAASAKKAAKPKKAKTPKKAAKPAAKKATKSPKKAKAAKPKKAKTPKKAAAAAKK	ATGGCCGACGTCGTAGCACCTGCTCCAGCTAAAGTCAAGAAGGCTTCCAAGCCTAAGAAGCCAGCATCCCACCCAAAGTACAGCGAGATGATCGCTGCTGCTGTTGGGGCCCTGAAGGAGAGGGGAGGCTCGTCCAGACAGGCAATCCTGAAGTATATCCAGGCTAACTACAAGGTTGGAGACAATCTCACCGCCATCAACGCTCACCTGAAGCTTGCCCTGAAGGCTGGCTGCAAGAGTGGCGCACTTAAGCAGGCCAAGGGAACTGGTGCTTCCGGTTCCTTTAAGCTGGGCGAGGTGAAGAAGGCAGCAAAGAAGGCAAAGAAGCCCAAGGCAGCCAAGCCAAAGAAGGCTAAGACACCCAAGAAGAAGGTTGCAAAGAAACCAGCTGCCAAGAAA…	hypothetical protein CAPTEDRAFT_19502 [Capitella teleta]	histone H1-delta-like; K11275 histone H1/5 (A)	Histone H5 OS=Gallus gallus PE=1 SV=2	H1/H5: 24-98	192	10.82	19.767	-0.822
evm.model.ctg5605.9	ScH1.3-2	ctg5605	11680	12258	+	MADVVAPAPAKVKKASKPKKPASHPKYSEMIAAAVGALKERGGSSRQAILKYIQANYKVGDNLTAINAHLKLALKAGCKSGALKQAKGTGASGSFKLGEVKKAAKKAKKPKAAKPKKAKTPKKKVAKKPAAKKTPSKKAASAKKAAKPKKAKTPKKAAKPAAKKATKSPKKAKAAKPKKAKTPKKAAAAAKK	ATGGCCGACGTCGTAGCACCTGCTCCAGCTAAAGTCAAGAAGGCTTCCAAGCCTAAGAAGCCAGCATCCCACCCAAAGTACAGCGAGATGATCGCTGCTGCTGTTGGGGCCCTGAAGGAGAGGGGAGGCTCGTCCAGACAGGCAATCCTGAAGTATATCCAGGCTAACTACAAGGTTGGAGACAATCTCACCGCCATCAACGCTCACCTGAAGCTTGCCCTGAAGGCTGGCTGCAAGAGTGGCGCACTTAAGCAGGCCAAGGGAACTGGTGCTTCCGGTTCCTTTAAGCTGGGCGAGGTGAAGAAGGCAGCAAAGAAGGCAAAGAAGCCCAAGGCAGCCAAGCCAAAGAAGGCTAAGACACCCAAGAAGAAGGTTGCAAAGAAACCAGCTGCCAAGAAA…	hypothetical protein CAPTEDRAFT_19502 [Capitella teleta]	histone H1-delta-like; K11275 histone H1/5 (A)	Histone H5 OS=Gallus gallus PE=1 SV=2	H1/H5: 24-98	192	10.82	19.767	-0.822
evm.model.ctg8584.4	ScH1.3-3	ctg8584	3281	3859	-	MADVVAPAPAKVKKASKPKKPASHPKYSEMIAAAVGALKERGGSSRQAILKYIQANYKVGDNLTAINAHLKLALKAGCKSGALKQAKGTGASGSFKLGEVKKAAKKAKKPKAAKPKKAKTPKKKVAKKPAAKKTPSKKAASAKKAAKPKKAKTPKKAAKPAAKKATKSPKKAKAAKPKKAKTPKKAAAAAKK	ATGGCCGACGTCGTAGCACCTGCTCCAGCTAAAGTCAAGAAGGCTTCCAAGCCTAAGAAGCCAGCATCCCACCCAAAGTACAGCGAGATGATCGCTGCTGCTGTTGGGGCCCTGAAGGAGAGGGGAGGCTCGTCCAGACAGGCAATCCTGAAGTATATCCAGGCTAACTACAAGGTTGGAGACAATCTCACCGCCATCAACGCTCACCTGAAGCTTGCCCTGAAGGCTGGCTGCAAGAGTGGCGCACTTAAGCAGGCCAAGGGAACTGGTGCTTCCGGTTCCTTTAAGCTGGGCGAGGTGAAGAAGGCAGCAAAGAAGGCAAAGAAGCCCAAGGCAGCCAAGCCAAAGAAGGCTAAGACACCCAAGAAGAAGGTTGCAAAGAAACCAGCTGCCAAGAAA…	hypothetical protein CAPTEDRAFT_19502 [Capitella teleta]	histone H1-delta-like; K11275 histone H1/5 (A)	Histone H5 OS=Gallus gallus PE=1 SV=2	H1/H5: 24-98	192	10.82	19.767	-0.822
evm.model.ctg10813.3	ScH1.3-4	ctg10813	2609	3187	-	MADVVAPAPAKVKKASKPKKPASHPKYSEMIAAAVGALKERGGSSRQAILKYIQANYKVGDNLTAINAHLKLALKAGCKSGALKQAKGTGASGSFKLGEVKKAAKKAKKPKAAKPKKAKTPKKKVAKKPAAKKTPSKKAASAKKAAKPKKAKTPKKAAKPAAKKATKSPKKAKAAKPKKAKTPKKAAAAAKK	ATGGCCGACGTCGTAGCACCTGCTCCAGCTAAAGTCAAGAAGGCTTCCAAGCCTAAGAAGCCAGCATCCCACCCAAAGTACAGCGAGATGATCGCTGCTGCTGTTGGGGCCCTGAAGGAGAGGGGAGGCTCGTCCAGACAGGCAATCCTGAAGTATATCCAGGCTAACTACAAGGTTGGAGACAATCTCACCGCCATCAACGCTCACCTGAAGCTTGCCCTGAAGGCTGGCTGCAAGAGTGGCGCACTTAAGCAGGCCAAGGGAACTGGTGCTTCCGGTTCCTTTAAGCTGGGCGAGGTGAAGAAGGCAGCAAAGAAGGCAAAGAAGCCCAAGGCAGCCAAGCCAAAGAAGGCTAAGACACCCAAGAAGAAGGTTGCAAAGAAACCAGCTGCCAAGAAA…	hypothetical protein CAPTEDRAFT_19502 [Capitella teleta]	histone H1-delta-like; K11275 histone H1/5 (A)	Histone H5 OS=Gallus gallus PE=1 SV=2	H1/H5: 24-98	192	10.82	19.767	-0.822
evm.model.ctg1356.6	ScH1.3-5	Hic_asm_1	74154538	74155116	-	MADVVAPAPAKVKKASKPKKPASHPKYSEMIAAAVGALKERGGSSRQAILKYIQANYKVGDNLTAINAHLKLALKAGCKSGALKQAKGTGASGSFKLGEVKKAAKKAKKPKAAKPKKAKTPKKKVAKKPAAKKTPSKKAASAKKAAKPKKAKTPKKAAKPAAKKATKSPKKAKAAKPKKAKTPKKAAAAAKK	ATGGCCGACGTCGTAGCACCTGCTCCAGCTAAAGTCAAGAAGGCTTCCAAGCCTAAGAAGCCAGCATCCCACCCAAAGTACAGCGAGATGATCGCTGCTGCTGTTGGGGCCCTGAAGGAGAGGGGAGGCTCGTCCAGACAGGCAATCCTGAAGTATATCCAGGCTAACTACAAGGTTGGAGACAATCTCACCGCCATCAACGCTCACCTGAAGCTTGCCCTGAAGGCTGGCTGCAAGAGTGGCGCACTTAAGCAGGCCAAGGGAACTGGTGCTTCCGGTTCCTTTAAGCTGGGCGAGGTGAAGAAGGCAGCAAAGAAGGCAAAGAAGCCCAAGGCAGCCAAGCCAAAGAAGGCTAAGACACCCAAGAAGAAGGTTGCAAAGAAACCAGCTGCCAAGAAA…	hypothetical protein CAPTEDRAFT_19502 [Capitella teleta]	histone H1-delta-like; K11275 histone H1/5 (A)	Histone H5 OS=Gallus gallus PE=1 SV=2	H1/H5: 24-98	192	10.82	19.767	-0.822
evm.model.ctg1311.1	ScH1.3-6	Hic_asm_1	74830973	74831551	+	MADVVAPAPAKVKKASKPKKPASHPKYSEMIAAAVGALKERGGSSRQAILKYIQANYKVGDNLTAINAHLKLALKAGCKSGALKQAKGTGASGSFKLGEVKKAAKKAKKPKAAKPKKAKTPKKKVAKKPAAKKTPSKKAASAKKAAKPKKAKTPKKAAKPAAKKATKSPKKAKAAKPKKAKTPKKAAAAAKK	ATGGCCGACGTCGTAGCACCTGCTCCAGCTAAAGTCAAGAAGGCTTCCAAGCCTAAGAAGCCAGCATCCCACCCAAAGTACAGCGAGATGATCGCTGCTGCTGTTGGGGCCCTGAAGGAGAGGGGAGGCTCGTCCAGACAGGCAATCCTGAAGTATATCCAGGCTAACTACAAGGTTGGAGACAATCTCACCGCCATCAACGCTCACCTGAAGCTTGCCCTGAAGGCTGGCTGCAAGAGTGGCGCACTTAAGCAGGCCAAGGGAACTGGTGCTTCCGGTTCCTTTAAGCTGGGCGAGGTGAAGAAGGCAGCAAAGAAGGCAAAGAAGCCCAAGGCAGCCAAGCCAAAGAAGGCTAAGACACCCAAGAAGAAGGTTGCAAAGAAACCAGCTGCCAAGAAA…	hypothetical protein CAPTEDRAFT_19502 [Capitella teleta]	histone H1-delta-like; K11275 histone H1/5 (A)	Histone H5 OS=Gallus gallus PE=1 SV=2	H1/H5: 24-98	192	10.82	19.767	-0.822
evm.model.ctg1371.6	ScH1.3-7	Hic_asm_1	75224363	75224941	-	MADVVAPAPAKVKKASKPKKPASHPKYSEMIAAAVGALKERGGSSRQAILKYIQANYKVGDNLTAINAHLKLALKAGCKSGALKQAKGTGASGSFKLGEVKKAAKKAKKPKAAKPKKAKTPKKKVAKKPAAKKTPSKKAASAKKAAKPKKAKTPKKAAKPAAKKATKSPKKAKAAKPKKAKTPKKAAAAAKK	ATGGCCGACGTCGTAGCACCTGCTCCAGCTAAAGTCAAGAAGGCTTCCAAGCCTAAGAAGCCAGCATCCCACCCAAAGTACAGCGAGATGATCGCTGCTGCTGTTGGGGCCCTGAAGGAGAGGGGAGGCTCGTCCAGACAGGCAATCCTGAAGTATATCCAGGCTAACTACAAGGTTGGAGACAATCTCACCGCCATCAACGCTCACCTGAAGCTTGCCCTGAAGGCTGGCTGCAAGAGTGGCGCACTTAAGCAGGCCAAGGGAACTGGTGCTTCCGGTTCCTTTAAGCTGGGCGAGGTGAAGAAGGCAGCAAAGAAGGCAAAGAAGCCCAAGGCAGCCAAGCCAAAGAAGGCTAAGACACCCAAGAAGAAGGTTGCAAAGAAACCAGCTGCCAAGAAA…	hypothetical protein CAPTEDRAFT_19502 [Capitella teleta]	histone H1-delta-like; K11275 histone H1/5 (A)	Histone H5 OS=Gallus gallus PE=1 SV=2	H1/H5: 24-98	192	10.82	19.767	-0.822
evm.model.ctg6665.14	ScH1.4-1	ctg6665	22953	23531	-	MADVVAAPAPAKVKKAAKPKKPTTHPKYSEMIAAAVGALKERGGSSRQAILKYIQANYKVGDNVTAINAHLKLALKAGCKSGALKQAKGTGASGSFKLGEVKKAAKKAKKPKAAKPKKAKTPKKKAAKKPAAKKTPTKKAASAKKAAKPKKAKTPKKAAKPAAKKATKSPKKAKAAKPKKTKTPKKAAAAKK	atggccgacgtcgtagcagcaccagcaccagctaaagttaagaaggctgcaaagcctaaaaagccaacaacccacccaaagtacagcgaaatgatcgctgctgctgttggggccctgaaggagaggggaggctcgtcaaggcaggcaatcctgaagtacatccaggctaactacaaggttggagacaatgtcaccgctatcaacgctcacctgaagcttgccctgaaggcaggttgcaagagtggcgcccttaagcaggctaagggaaccggtgcctctgggtccttcaagcttggagaggtgaagaaggcagcaaagaaggcgaagaagcccaaggcagccaagccaaagaaggccaagacacccaagaagaaggcagccaagaagccagctgccaag…	hypothetical protein CAPTEDRAFT_19502 [Capitella teleta]	hypothetical protein; K11275 histone H1/5 (A)	Histone H5 OS=Gallus gallus PE=1 SV=2	H1/H5: 25-99	192	10.82	19.797	-0.844
evm.model.ctg6665.15	ScH1.4-2	ctg6665	24339	24917	-	MADVVAAPAPAKVKKAAKPKKPTTHPKYSEMIAAAVGALKERGGSSRQAILKYIQANYKVGDNVTAINAHLKLALKAGCKSGALKQAKGTGASGSFKLGEVKKAAKKAKKPKAAKPKKAKTPKKKAAKKPAAKKTPTKKAASAKKAAKPKKAKTPKKAAKPAAKKATKSPKKAKAAKPKKTKTPKKAAAAKK	atggccgacgtcgtagcagcaccagcaccagctaaagttaagaaggctgcaaagcctaaaaagccaacaacccacccaaagtacagcgaaatgatcgctgctgctgttggggccctgaaggagaggggaggctcgtcaaggcaggcaatcctgaagtacatccaggctaactacaaggttggagacaatgtcaccgctatcaacgctcacctgaagcttgccctgaaggcaggttgcaagagtggcgcccttaagcaggctaagggaaccggtgcctctgggtccttcaagcttggagaggtgaagaaggcagcaaagaaggcgaagaagcccaaggcagccaagccaaagaaggccaagacacccaagaagaaggcagccaagaagccagctgccaag…	hypothetical protein CAPTEDRAFT_19502 [Capitella teleta]	hypothetical protein; K11275 histone H1/5 (A)	Histone H5 OS=Gallus gallus PE=1 SV=2	H1/H5: 25-99	192	10.82	19.797	-0.844
evm.model.ctg1356.11	ScH1.5	Hic_asm_1	74147925	74148443	-	MADVVAPAPAKVKKASKPKKPASHPKYSEMIAAAVGALKERGGSSRQAILKYIQANYKVGDNLTAINAHLKLALKAGCKSGALKQAKGTGASGSFKLGEVKKAAKKAKKPKAAKPKKAKTPKKKVAKKPAAKKTPSKKAASAKKAAKPKKAKTPKKAAKPAAKKATKICTDI	ATGGCCGACGTCGTAGCACCTGCTCCAGCTAAAGTCAAGAAGGCTTCCAAGCCTAAGAAGCCAGCATCCCACCCAAAGTACAGCGAGATGATCGCTGCTGCTGTTGGGGCCCTGAAGGAGAGGGGAGGCTCGTCCAGACAGGCAATCCTGAAGTATATCCAGGCTAACTACAAGGTTGGAGACAATCTCACCGCCATCAACGCTCACCTGAAGCTTGCCCTGAAGGCTGGCTGCAAGAGTGGCGCACTTAAGCAGGCCAAGGGAACTGGTGCTTCCGGTTCCTTTAAGCTGGGCGAGGTGAAGAAGGCAGCAAAGAAGGCAAAGAAGCCCAAGGCAGCCAAGCCAAAGAAGGCTAAGACACCCAAGAAGAAGGTTGCAAAGAAACCAGCTGCCAAGAAA…	hypothetical protein CAPTEDRAFT_19502 [Capitella teleta]	hypothetical protein; K11275 histone H1/5 (A)	Histone H5 OS=Gallus gallus PE=1 SV=2	H1/H5: 24-98	172	10.61	17.7835	-0.684
evm.model.ctg119.10	ScH1oo	Hic_asm_5	26862578	26864453	+	MAEKVKSTHPKYLVMVKEAITSSEEKKGSTVNAIQSFICAKYALAPEVVRKNLKPALAKGIEDGTLVRPKDSDAKGFTGRFKLNKAKEAEAAKAKKEKEKEKAKKEKEKEKAKAKKVATTNGEKTSVKKTTVKKTGVKTAAGTSAKSPGKKTPKKTAPKMAKPTKPAAKAAKPKTTKATLKTPKKAPKKVGKIARATPQATK		sperm-specific protein PHI-2B/PHI-3-like [Saccoglossus kowalevskii]	sperm-specific protein PHI-2B/PHI-3-like; K11275 histone H1/5 (A)	Histone H1oo OS=Bos taurus GN=H1FOO PE=1 SV=1	H1/H5: 9-84	202	10.32	21.62	-0.951
evm.model.ctg164.5	ScH1.0	Hic_asm_9	6768664	6769239	+	MSAAPAVAAATPKAKKAAKPKKPATHPKYSEMIVKAIQSLKERSGSSRQAILKYIMANFNVGKDAAAVNSRLKMALRKAAAKGVLKQSKGTGASGSFRVGEKPKAEKKAKKVAKPKKPKTPKKAKAKKPAGEKKAAKPKKAKSPKKAKAAKPKKAKSPKKAKAAKPKKAKSPKKAAKPKKAKTPKKAAAKK	ATGTCTGCTGCACCCGCCGTTGCTGCTGCTACCCCGAAAGCTAAGAAGGCTGCAAAGCCTAAGAAGCCTGCGACCCACCCGAAATACAGCGAGATGATCGTAAAGGCTATCCAGAGCCTAAAGGAGCGATCTGGCTCCTCCCGACAAGCCATTCTGAAGTACATTATGGCTAACTTCAACGTCGGAAAGGACGCCGCTGCCGTCAACTCCAGGCTGAAGATGGCTCTGAGGAAAGCTGCTGCCAAGGGCGTCCTCAAGCAGTCAAAAGGCACTGGCGCCTCTGGCTCATTCCGTGTAGGAGAGAAACCCAAGGCTGAGAAGAAGGCAAAGAAGGTCGCCAAGCCTAAGAAGCCCAAGACACCCAAGAAGGCCAAGGCCAAGAAACCTGCTGGGGAAAAG…	hypothetical protein CAPTEDRAFT_19502 [Capitella teleta]	hypothetical protein; K11275 histone H1/5 (A)	Histone H1.0 OS=Mus musculus GN=H1f0 PE=2 SV=4	H1/H5: 26-100	191	11.11	20.0694	-1.023
evm.model.ctg4484.9	ScH2A.1-1	ctg4484	11377	11754	+	MSGRGKGGKTKGKAKSRSSRAGLQFPVGRIHRLLRKGNYAERVGAGAPVYLAAVLEYLAAEVLELAGNAARDNKKTRIIPRHLQLAIRNDEELNKLLSGVTIAQGGVLPNIQAVLLPKKTQKAGK	atgtctggacgaggaaaaggaggaaagacaaagggaaaggcaaagagccgatcatcccgtgctgggcttcagttcccagtcggcagaatccaccgtctgctgcgaaaaggcaactacgcagaacgtgtcggagccggcgcaccagtatacctggctgccgttctcgagtacctggctgctgaggtcttggagttggctggcaacgctgcccgcgacaacaagaagactaggatcatccccagacatctccagctcgccatccgcaacgatgaggaattgaacaaactcctctccggcgtgaccatcgcccagggtggtgtcttgcccaacatccaggctgttcttctgcccaagaagactcagaaggccggaaagtaa	histone H2A-like [Linepithema humile]	histone H2A; K11251 histone H2A (A)	Histone H2A OS=Asterias rubens PE=1 SV=2	H2A: 16-125	125	10.9	13.3757	-0.343
evm.model.ctg4484.10	ScH2A.1-2	ctg4484	12395	12772	+	MSGRGKGGKTKGKAKSRSSRAGLQFPVGRIHRLLRKGNYAERVGAGAPVYLAAVLEYLAAEVLELAGNAARDNKKTRIIPRHLQLAIRNDEELNKLLSGVTIAQGGVLPNIQAVLLPKKTQKAGK	atgtctggacgaggaaaaggaggaaagacaaagggaaaggcaaagagccgatcatcccgtgctgggcttcagttcccagtcggcagaatccaccgtctgctgcgaaaaggcaactacgcagaacgtgtcggagccggcgcaccagtatacctggctgccgttctcgagtacctggctgctgaggtcttggagttggctggcaacgctgcccgcgacaacaagaagactaggatcatccccagacatctccagctcgccatccgcaacgatgaggaattgaacaaactcctctccggcgtgaccatcgcccagggtggtgtcttgcccaacatccaggctgttcttctgcccaagaagactcagaaggccggaaagctgtacgcggccggccggccgacc…	hypothetical protein RFI_06231, partial [Reticulomyxa filosa]	histone H2A; K11251 histone H2A (A)	Histone H2A OS=Asterias rubens PE=1 SV=2	H2A: 16-125	125	10.9	13.3757	-0.343
evm.model.ctg4484.16	ScH2A.1-3	ctg4484	23950	24327	+	MSGRGKGGKTKGKAKSRSSRAGLQFPVGRIHRLLRKGNYAERVGAGAPVYLAAVLEYLAAEVLELAGNAARDNKKTRIIPRHLQLAIRNDEELNKLLSGVTIAQGGVLPNIQAVLLPKKTQKAGK	atgtctggacgaggaaaaggaggaaagacaaagggaaaggcaaagagccgatcatcccgtgctgggcttcagttcccagtcggcagaatccaccgtctgctgcgaaaaggcaactacgcagaacgtgtcggagccggcgcaccagtatacctggctgccgttctcgagtacctggctgctgaggtcttggagttggctggcaacgctgcccgcgacaacaagaagactaggatcatccccagacatctccagctcgccatccgcaacgatgaggaattgaacaaactcctctccggcgtgaccatcgcccagggtggtgtcttgcccaacatccaggctgttcttctgcccaagaagactcagaaggccggaaagtaa	histone H2A-like [Linepithema humile]	histone H2A; K11251 histone H2A (A)	Histone H2A OS=Asterias rubens PE=1 SV=2	H2A: 16-125	125	10.9	13.3757	-0.343
evm.model.ctg4484.17	ScH2A.1-4	ctg4484	24968	25345	+	MSGRGKGGKTKGKAKSRSSRAGLQFPVGRIHRLLRKGNYAERVGAGAPVYLAAVLEYLAAEVLELAGNAARDNKKTRIIPRHLQLAIRNDEELNKLLSGVTIAQGGVLPNIQAVLLPKKTQKAGK	atgtctggacgaggaaaaggaggaaagacaaagggaaaggcaaagagccgatcatcccgtgctgggcttcagttcccagtcggcagaatccaccgtctgctgcgaaaaggcaactacgcagaacgtgtcggagccggcgcaccagtatacctggctgccgttctcgagtacctggctgctgaggtcttggagttggctggcaacgctgcccgcgacaacaagaagactaggatcatccccagacatctccagctcgccatccgcaacgatgaggaattgaacaaactcctctccggcgtgaccatcgcccagggtggtgtcttgcccaacatccaggctgttcttctgcccaagaagactcagaaggccggaaagtaa	histone H2A-like [Linepithema humile]	histone H2A; K11251 histone H2A (A)	Histone H2A OS=Asterias rubens PE=1 SV=2	H2A: 16-125	125	10.9	13.3757	-0.343
evm.model.ctg4484.18	ScH2A.1-5	ctg4484	25986	26363	+	MSGRGKGGKTKGKAKSRSSRAGLQFPVGRIHRLLRKGNYAERVGAGAPVYLAAVLEYLAAEVLELAGNAARDNKKTRIIPRHLQLAIRNDEELNKLLSGVTIAQGGVLPNIQAVLLPKKTQKAGK	atgtctggacgaggaaaaggaggaaagacaaagggaaaggcaaagagccgatcatcccgtgctgggcttcagttcccagtcggcagaatccaccgtctgctgcgaaaaggcAACTACGCAGAACGTGTCGGAGCCGGCGCACCAGTATACCTGGCTGCCGTTCTCGAGTACCTGGCTGCTGAGGTCTTGGAGTTGGCTGGCAACGCTGCCCGCGACAACAAGAAGACTAGGATCATCCCCAGACATCTCCAGCTCGCCATCCGCAACGATGAGGAATTGAACAAACTCCTCTCCGGCGTGACCATCGCCCAGGGTGGTGTCTTGCCCAACATCCAGGCTGTTCTTCTGCCCAAGAAGACTCAGAAGGCCGGAAAGTAA	histone H2A-like [Linepithema humile]	histone H2A; K11251 histone H2A (A)	Histone H2A OS=Asterias rubens PE=1 SV=2	H2A: 16-125	125	10.9	13.3757	-0.343
evm.model.ctg5055.4	ScH2A.1-6	ctg5055	3762	4139	+	MSGRGKGGKTKGKAKSRSSRAGLQFPVGRIHRLLRKGNYAERVGAGAPVYLAAVLEYLAAEVLELAGNAARDNKKTRIIPRHLQLAIRNDEELNKLLSGVTIAQGGVLPNIQAVLLPKKTQKAGK	atgtctggacgaggaaaaggcggaaagaccaagggaaaggcaaagagccgatcatcccgtgccgggcttcagtttcccgtcggcagaatccaccgtctgctgcgaaagggcaactatgccgagcgtgtcggagctggtgccccagtctacctggctgccgttctcgagtacttggctgctgaggtgttggagttggccggcaacgctgcccgcgacaacaagaagaccagaatcatccccagacaccttcagctggctattcgcaacgacgaggaattgaacaaactcctctccggcgtgacgatcgcccagggtggtgtcctgcccaacatccaggctgttcttctgcccaagaagacacagaaggccggaaagctgaaagtgaccagggctgtgact…	histone H2A-like [Linepithema humile]	histone H2A; K11251 histone H2A (A)	Histone H2A OS=Asterias rubens PE=1 SV=2	H2A: 16-125	125	10.9	13.3757	-0.343
evm.model.ctg5605.3	ScH2A.1-7	ctg5605	2995	3372	+	MSGRGKGGKTKGKAKSRSSRAGLQFPVGRIHRLLRKGNYAERVGAGAPVYLAAVLEYLAAEVLELAGNAARDNKKTRIIPRHLQLAIRNDEELNKLLSGVTIAQGGVLPNIQAVLLPKKTQKAGK	ATGTCTGGACGAGGAAAAGGCGGAAAGACCAAGGGAAAGGCAAAGAGCCGATCATCCCGTGCCGGGCTTCAGTTTCCCGTCGGCAGAATCCACCGTCTGCTGCGAAAGGGCAACTATGCCGAGCGTGTCGGAGCTGGTGCCCCAGTCTACCTGGCTGCCGTTCTCGAGTACTTGGCTGCTGAGGTGTTGGAGTTGGCCGGCAACGCTGCCCGCGACAACAAGAAGACCAGAATCATCCCCAGACACCTTCAGCTGGCTATTCGCAACGACGAGGAATTGAACAAACTCCTCTCCGGCGTGACGATCGCCCAGGGTGGTGTCCTGCCCAACATCCAGGCTGTTCTTCTGCCCAAGAAGACACAGAAGGCCGGAAAGCTGAAAGTGACCAGGGCTGTGACT…	histone H2A [Crassostrea gigas]	histone H2A; K11251 histone H2A (A)	Histone H2A OS=Asterias rubens PE=1 SV=2	H2A: 16-125	125	10.9	13.3757	-0.343
evm.model.ctg6665.27	ScH2A.1-8	ctg6665	45455	45832	-	MSGRGKGGKTKGKAKSRSSRAGLQFPVGRIHRLLRKGNYAERVGAGAPVYLAAVLEYLAAEVLELAGNAARDNKKTRIIPRHLQLAIRNDEELNKLLSGVTIAQGGVLPNIQAVLLPKKTQKAGK	atgtctggacgaggaaaaggaggaaagacaaagggaaaggcaaagagccgatcatcccgtgctgggcttcagttcccagtcggcagaatccaccgtctgctgcgaaaaggcaactacgcagaacgtgtcggagccggcgcaccagtatacctggctgccgttctcgagtacctggctgctgaggtcttggagttggctggcaacgctgcccgcgacaacaagaagactaggatcatccccagacatctccagctcgccatccgcaacgatgaggaattgaacaaactcctctccggcgtgaccatcgcccagggtggtgtcttgcccaacatccaggctgttcttctgcccaagaagactcagaaggccggaaagtaa	histone H2A-like [Linepithema humile]	histone H2A; K11251 histone H2A (A)	Histone H2A OS=Asterias rubens PE=1 SV=2	H2A: 16-125	125	10.9	13.3757	-0.343
evm.model.ctg6665.28	ScH2A.1-9	ctg6665	46473	46850	-	MSGRGKGGKTKGKAKSRSSRAGLQFPVGRIHRLLRKGNYAERVGAGAPVYLAAVLEYLAAEVLELAGNAARDNKKTRIIPRHLQLAIRNDEELNKLLSGVTIAQGGVLPNIQAVLLPKKTQKAGK	atgtctggacgaggaaaaggaggaaagacaaagggaaaggcaaagagccgatcatcccgtgctgggcttcagttcccagtcggcagaatccaccgtctgctgcgaaaaggcaactacgcagaacgtgtcggagccggcgcaccagtatacctggctgccgttctcgagtacctggctgctgaggtcttggagttggctggcaacgctgcccgcgacaacaagaagactaggatcatccccagacatctccagctcgccatccgcaacgatgaggaattgaacaaactcctctccggcgtgaccatcgcccagggtggtgtcttgcccaacatccaggctgttcttctgcccaagaagactcagaaggccggaaagtaa	histone H2A-like [Linepithema humile]	histone H2A; K11251 histone H2A (A)	Histone H2A OS=Asterias rubens PE=1 SV=2	H2A: 16-125	125	10.9	13.3757	-0.343
evm.model.ctg7145.6	ScH2A.1-10	ctg7145	10937	11314	+	MSGRGKGGKTKGKAKSRSSRAGLQFPVGRIHRLLRKGNYAERVGAGAPVYLAAVLEYLAAEVLELAGNAARDNKKTRIIPRHLQLAIRNDEELNKLLSGVTIAQGGVLPNIQAVLLPKKTQKAGK	atgtctggacgaggaaaaggcggaaagaccaagggaaaggcaaagagccgatcatcccgtgccgggcttcagtttcccgtcggcagaatccaccgtctgctgcgaaagggcaactatgccgagcgtgtcggagctggtgccccagtctacctggctgccgttctcgagtacttggctgctgaggtgttggagttggccggcaacgctgcccgcgacaacaagaagaccagaatcatccccagacaccttcagctggctattcgcaacgacgaggaattgaacaaactcctctccggcgtgacgatcgcccagggtggtgtcctgcccaacatccaggctgttcttctgcccaagaagacacagaaggccggaaagctgaaagtgaccagggctgtgact…	histone H2A-like [Linepithema humile]	histone H2A; K11251 histone H2A (A)	Histone H2A OS=Asterias rubens PE=1 SV=2	H2A: 16-125	125	10.9	13.3757	-0.343
evm.model.ctg7342.3	ScH2A.1-11	ctg7342	5754	6131	+	MSGRGKGGKTKGKAKSRSSRAGLQFPVGRIHRLLRKGNYAERVGAGAPVYLAAVLEYLAAEVLELAGNAARDNKKTRIIPRHLQLAIRNDEELNKLLSGVTIAQGGVLPNIQAVLLPKKTQKAGK	atgtctggacgaggaaaaggaggaaagacaaagggaaaggcaaagagccgatcatcccgtgctgggcttcagttcccagtcggcagaatccaccgtctgctgcgaaaaggcaactacgcagaacgtgtcggagccggcgcaccagtatacctggctgccgttctcgagtacctggctgctgaggtcttggagttggctggcaacgctgcccgcgacaacaagaagactaggatcatccccagacatctccagctcgccatccgcaacgatgaggaattgaacaaactcctctccggcgtgaccatcgcccagggtggtgtcttgcccaacatccaggctgttcttctgcccaagaagactcagaaggccggaaagtaa	histone H2A-like [Linepithema humile]	histone H2A; K11251 histone H2A (A)	Histone H2A OS=Asterias rubens PE=1 SV=2	H2A: 16-125	125	10.9	13.3757	-0.343
evm.model.ctg7342.4	ScH2A.1-12	ctg7342	6772	7149	+	MSGRGKGGKTKGKAKSRSSRAGLQFPVGRIHRLLRKGNYAERVGAGAPVYLAAVLEYLAAEVLELAGNAARDNKKTRIIPRHLQLAIRNDEELNKLLSGVTIAQGGVLPNIQAVLLPKKTQKAGK	atgtctggacgaggaaaaggaggaaagacaaagggaaaggcaaagagccgatcatcccgtgctgggcttcagttcccagtcggcagaatccaccgtctgctgcgaaaaggcaactacgcagaacgtgtcggagccggcgcaccagtatacctggctgccgttctcgagtacctggctgctgaggtcttggagttggctggcaacgctgcccgcgacaacaagaagactaggatcatccccagacatctccagctcgccatccgcaacgatgaggaattgaacaaactcctctccggcgtgaccatcgcccagggtggtgtcttgcccaacatccaggctgttcttctgcccaagaagactcagaaggccggaaagtaa	histone H2A-like [Linepithema humile]	histone H2A; K11251 histone H2A (A)	Histone H2A OS=Asterias rubens PE=1 SV=2	H2A: 16-125	125	10.9	13.3757	-0.343
evm.model.ctg7342.5	ScH2A.1-13	ctg7342	7790	8167	+	MSGRGKGGKTKGKAKSRSSRAGLQFPVGRIHRLLRKGNYAERVGAGAPVYLAAVLEYLAAEVLELAGNAARDNKKTRIIPRHLQLAIRNDEELNKLLSGVTIAQGGVLPNIQAVLLPKKTQKAGK	atgtctggacgaggaaaaggaggaaagacaaagggaaaggcaaagagccgatcatcccgtgctgggcttcagttcccagtcggcagaatccaccgtctgctgcgaaaaggcaactacgcagaacgtgtcggagccggcgcaccagtatacctggctgccgttctcgagtacctggctgctgaggtcttggagttggctggcaacgctgcccgcgacaacaagaagactaggatcatccccagacatctccagctcgccatccgcaacgatgaggaattgaacaaactcctctccggcgtgaccatcgcccagggtggtgtcttgcccaacatccaggctgttcttctgcccaagaagactcagaaggccggaaagctgtacgcggccggccggccgacc…	hypothetical protein RFI_06231, partial [Reticulomyxa filosa]	histone H2A; K11251 histone H2A (A)	Histone H2A OS=Asterias rubens PE=1 SV=2	H2A: 16-125	125	10.9	13.3757	-0.343
evm.model.ctg8584.5	ScH2A.1-14	ctg8584	5534	5911	-	MSGRGKGGKTKGKAKSRSSRAGLQFPVGRIHRLLRKGNYAERVGAGAPVYLAAVLEYLAAEVLELAGNAARDNKKTRIIPRHLQLAIRNDEELNKLLSGVTIAQGGVLPNIQAVLLPKKTQKAGK	ATGTCTGGACGAGGAAAAGGCGGAAAGACCAAGGGAAAGGCAAAGAGCCGATCATCCCGTGCCGGGCTTCAGTTTCCCGTCGGCAGAATCCACCGTCTGCTGCGAAAGGGCAACTATGCCGAGCGTGTCGGAGCTGGTGCCCCAGTCTACCTGGCTGCCGTTCTCGAGTACTTGGCTGCTGAGGTGTTGGAGTTGGCCGGCAACGCTGCCCGCGACAACAAGAAGACCAGAATCATCCCCAGACACCTTCAGCTGGCTATTCGCAACGACGAGGAATTGAACAAACTCCTCTCCGGCGTGACGATCGCCCAGGGTGGTGTCCTGCCCAACATCCAGGCTGTTCTTCTGCCCAAGAAGACACAGAAGGCCGGAAAGCTGAAAGTGACCAGGGCTGTGACT…	histone H2A-like [Linepithema humile]	histone H2A; K11251 histone H2A (A)	Histone H2A OS=Asterias rubens PE=1 SV=2	H2A: 16-125	125	10.9	13.3757	-0.343
evm.model.ctg10357.4	ScH2A.1-15	ctg10357	8379	8756	-	MSGRGKGGKTKGKAKSRSSRAGLQFPVGRIHRLLRKGNYAERVGAGAPVYLAAVLEYLAAEVLELAGNAARDNKKTRIIPRHLQLAIRNDEELNKLLSGVTIAQGGVLPNIQAVLLPKKTQKAGK	atgtctggacgaggaaaaggaggaaagacaaagggaaaggcaaagagccgatcatcccgtgctgggcttcagttcccagtcggcagaatccaccgtctgctgcgaaaaggcaactacgcagaacgtgtcggagccggcgcaccagtatacctggctgccgttctcgagtacctggctgctgaggtcttggagttggctggcaacgctgcccgcgacaacaagaagactaggatcatccccagacatctccagctcgccatccgcaacgatgaggaattgaacaaactcctctccggcgtgaccatcgcccagggtggtgtcttgcccaacatccaagctgttcttctgcccaagaagactcagaaggccggaaagtaa	histone H2A-like [Linepithema humile]	histone H2A; K11251 histone H2A (A)	Histone H2A OS=Asterias rubens PE=1 SV=2	H2A: 16-125	125	10.9	13.3757	-0.343
evm.model.ctg10813.4	ScH2A.1-16	ctg10813	4865	5242	-	MSGRGKGGKTKGKAKSRSSRAGLQFPVGRIHRLLRKGNYAERVGAGAPVYLAAVLEYLAAEVLELAGNAARDNKKTRIIPRHLQLAIRNDEELNKLLSGVTIAQGGVLPNIQAVLLPKKTQKAGK	ATGTCTGGACGAGGAAAAGGCGGAAAGACCAAGGGAAAGGCAAAGAGCCGATCATCCCGTGCCGGGCTTCAGTTTCCCGTCGGCAGAATCCACCGTCTGCTGCGAAAGGGCAACTATGCCGAGCGTGTCGGAGCTGGTGCCCCAGTCTACCTGGCTGCCGTTCTCGAGTACTTGGCTGCTGAGGTGTTGGAGTTGGCCGGCAACGCTGCCCGCGACAACAAGAAGACCAGAATCATCCCCAGACACCTTCAGCTGGCTATTCGCAACGACGAGGAATTGAACAAACTCCTCTCCGGCGTGACGATCGCCCAGGGTGGTGTCCTGCCCAACATCCAGGCTGTTCTTCTGCCCAAGAAGACACAGAAGGCCGGAAAGCTGAAAGTGACCAGGGCTGTGACT…	histone H2A-like [Linepithema humile]	histone H2A; K11251 histone H2A (A)	Histone H2A OS=Asterias rubens PE=1 SV=2	H2A: 16-125	125	10.9	13.3757	-0.343
evm.model.ctg1356.10	ScH2A.1-17	Hic_asm_1	74150119	74150496	-	MSGRGKGGKTKGKAKSRSSRAGLQFPVGRIHRLLRKGNYAERVGAGAPVYLAAVLEYLAAEVLELAGNAARDNKKTRIIPRHLQLAIRNDEELNKLLSGVTIAQGGVLPNIQAVLLPKKTQKAGK	ATGTCTGGACGAGGAAAAGGCGGAAAGACCAAGGGAAAGGCAAAGAGCCGATCATCCCGTGCCGGGCTTCAGTTTCCCGTCGGCAGAATCCACCGTCTGCTGCGAAAGGGCAACTATGCCGAGCGTGTCGGAGCTGGTGCCCCAGTCTACCTGGCTGCCGTTCTCGAGTACTTGGCTGCTGAGGTGTTGGAGTTGGCCGGCAACGCTGCCCGCGACAACAAGAAGACCAGAATCATCCCCAGACACCTTCAGCTGGCTATTCGCAACGACGAGGAATTGAACAAACTCCTCTCCGGCGTGACGATCGCCCAGGGTGGTGTCCTGCCCAACATCCAGGCTGTTCTTCTGCCCAAGAAGACACAGAAGGCCGGAAAGCTGAAAGTGACCAGGGCTGTGACT…	histone H2A-like [Linepithema humile]	histone H2A; K11251 histone H2A (A)	Histone H2A OS=Asterias rubens PE=1 SV=2	H2A: 16-125	125	10.9	13.3757	-0.343
evm.model.ctg1311.5	ScH2A.1-18	Hic_asm_1	74835595	74835972	+	MSGRGKGGKTKGKAKSRSSRAGLQFPVGRIHRLLRKGNYAERVGAGAPVYLAAVLEYLAAEVLELAGNAARDNKKTRIIPRHLQLAIRNDEELNKLLSGVTIAQGGVLPNIQAVLLPKKTQKAGK	ATGTCTGGACGAGGAAAAGGCGGAAAGACCAAGGGAAAGGCAAAGAGCCGATCATCCCGTGCCGGGCTTCAGTTTCCCGTCGGCAGAATCCACCGTCTGCTGCGAAAGGGCAACTATGCCGAGCGTGTCGGAGCTGGTGCCCCAGTCTACCTGGCTGCCGTTCTCGAGTACTTGGCTGCTGAGGTGTTGGAGTTGGCCGGCAACGCTGCCCGCGACAACAAGAAGACCAGAATCATCCCCAGACACCTTCAGCTGGCTATTCGCAACGACGAGGAATTGAACAAACTCCTCTCCGGCGTGACGATCGCCCAGGGTGGTGTCCTGCCCAACATCCAGGCTGTTCTTCTGCCCAAGAAGACACAGAAGGCCGGAAAGCTGAAAGTGACCAGGGCTGTGACT…	histone H2A-like [Linepithema humile]	histone H2A; K11251 histone H2A (A)	Histone H2A OS=Asterias rubens PE=1 SV=2	H2A: 16-125	125	10.9	13.3757	-0.343
evm.model.ctg1371.7	ScH2A.1-19	Hic_asm_1	75226614	75226991	-	MSGRGKGGKTKGKAKSRSSRAGLQFPVGRIHRLLRKGNYAERVGAGAPVYLAAVLEYLAAEVLELAGNAARDNKKTRIIPRHLQLAIRNDEELNKLLSGVTIAQGGVLPNIQAVLLPKKTQKAGK	ATGTCTGGACGAGGAAAAGGCGGAAAGACCAAGGGAAAGGCAAAGAGCCGATCATCCCGTGCCGGGCTTCAGTTTCCCGTCGGCAGAATCCACCGTCTGCTGCGAAAGGGCAACTATGCCGAGCGTGTCGGAGCTGGTGCCCCAGTCTACCTGGCTGCCGTTCTCGAGTACTTGGCTGCTGAGGTGTTGGAGTTGGCCGGCAACGCTGCCCGCGACAACAAGAAGACCAGAATCATCCCCAGACACCTTCAGCTGGCTATTCGCAACGACGAGGAATTGAACAAACTCCTCTCCGGCGTGACGATCGCCCAGGGTGGTGTCCTGCCCAACATCCAGGCTGTTCTTCTGCCCAAGAAGACACAGAAGGCCGGAAAGCTGAAAGTGACCAGGGCTGTGACT…	histone H2A-like [Linepithema humile]	histone H2A; K11251 histone H2A (A)	Histone H2A OS=Asterias rubens PE=1 SV=2	H2A: 16-125	125	10.9	13.3757	-0.343
evm.model.ctg8547.3	ScH2A.2	ctg8547	5651	6025	-	MSGRGKGGKTKGKAKSRSSRAGLQFPVGRIHRLLRKGNYAERVGAGAPVYLAAVLEYLAAEVLELAGNAARDNKKTRIIPRHLQLAIRNDEELNKLSPRDDRQGGVLPNIQAVLLPKKTQKAGK	atgtctggacgaggaaaaggcggaaagaccaagggaaaggcaaagagccgatcatcccgtgccgggcttcagtttcccgtcggcagaatccaccgtctgctgcgaaagggcaactatgccgagcgtgtcggagctggtgccccagtctacctggctgccgttctcgagtacttggctgctgaggtgttggagttggccggcaacgctgcccgcgacaacaagaagaccagaatcatccccagacaccttcagctggctattcgcaacgacgaggaattgaacaaactctctccgcgtgacgatcgccagggtggtgtcctgcccaacatccaggctgttcttctgcccaagaagacacagaaggccggaaagtaa	histone H2A-like [Crassostrea gigas]	histone H2A-like; K11251 histone H2A (A)	Histone H2A OS=Asterias rubens PE=1 SV=2	H2A: 16-124	124	10.87	13.4606	-0.594
evm.model.ctg59.73	ScH2A.V	Hic_asm_4	47686310	47691410	-	MPGGKAGKDSGKAKAKAVSRSARAGLQFPVGRIHRHLKNRTTSHGRVGATAAVYSAAILEYLTAEVLELAGNASKDLKVKRITPRHLQLAIRGDEELDSLIKATIAGGGVIPHIHKSLIGKKGSQKA	ATGCCTGGTGGTAAAGCTGGTAAAGATTCTGGAAAGGCCAAGGCTAAGGCAGTGTCAAGGTCCGCACGAGCAGGATTGCAGTTCCCAGTCGGTCGTATTCACAGACATCTAAAGAACCGAACAACTAGCCATGGACGTGTTGGAGCTACAGCTGCAGTTTACAGCGCTGCAATTCTGGAATATTTAACTGCTGAGGTGCTTGAGTTGGCAGGCAACGCCAGTAAGGATCTCAAGGTGAAGAGAATAACTCCACGTCATTTGCAGCTAGCCATTCGTGGTGACGAAGAGTTGGACTCCCTCATCAAAGCCACTATTGCTGGCGGTGGTGTCATTCCTCACATCCACAAATCTCTCATTGGCAAGAAGGGTTCTCAGAAGGCATAG	histone 2A.Z [Aplysia californica]	H2A.F/Z; histone H2 A.F/Z; K11251 histone H2A (A)	Histone H2A.V (Fragment) OS=Strongylocentrotus purpuratus GN=H2A.F/Z PE=1 SV=1	H2A: 21-136	142	10.31	15.2566	-0.406
evm.model.ctg263.11	ScH2A.1macro	Hic_asm_4	70201592	70212973	+	MSGRGGKKKAKILSKSTRSGVLFPVARMQRYLKRDTHHFRIGAGAPVYMAAVIEYLTAEILELAGNAARDNKKTRVTPRHILLAVANDEELHQLLKHVTIASGGVIPRIHPELLVRKKGGKVVTIGQTVAKTPVKPPSPSKPKAPKAAKVKASPATPKRVVAKKGKTVSGFPLLDLKVADSTDGPPTAKGTAAGGFTILSEKKLFLGQKLTVLQGDIVKVTADAIVHPTSSNFYMGGEVGSALKKAGGNDFQDEVKALQAAHGTLDTAGAAICPGRNFPAKFVIHCNSPSWTETNSQQLLDKTIKNCLALADEKDLKSIALPSVSSGRAGFPKQTAAQIILRSISNYFAASMASSIKQVYFVLYDTESVTVYTSELQRLDS	ATGTCGGGACGAGGTGGAAAGAAAAAAGCAAAGATTTTGTCTAAATCTACACGGTCGGGAGTGTTGTTTCCCGTTGCTAGAATGCAGCGTTACTTGAAGCGAGACACTCATCATTTCCGGATAGGAGCAGGTGCCCCTGTGTACATGGCTGCAGTTATCGAATATTTGACAGCTGAAATCCTTGAGTTAGCTGGGAATGCTGCTAGAGACAACAAGAAGACCAGAGTCACACCACGACACATTTTGCTGGCTGTTGCTAATGATGAAGAATTACACCAGTTACTAAAACATGTCACCATAGCATCAGGAGGTGTAATTCCTAGGATCCATCCAGAATTACTTGTCAGGAAAAAAGGTGGTAAAGTGGTTACTATTGGACAGACTGTTGCCAAGACACCA…	core histone macro-H2A.1-like isoform X1 [Crassostrea gigas]	core histone macro-H2A.1-like; K11251 histone H2A (A)	Core histone macro-H2A.1 OS=Gallus gallus GN=H2AFY PE=1 SV=3	macro: 193-378/H2A: 5-117	381	9.95	40.6151	-0.159
evm.model.ctg1118.15	ScH2Asperm	Hic_asm_13	3554950	3556082	-	MSGRGKGGKIKKAGKSRSSRAGLQFPVGRIHRLLRKGNYAERIGAGAPVYLAAVLEYLGAEVLELAGNAARDNKKSRIIPRHIQLAIRNDEELNKLLSGVTISQGGVLPNIQNALLPKKTSKGPKSAPSSQSQEF	ATGTCGGGACGAGGAAAAGGCGGGAAAATCAAGAAGGCGGGAAAGTCGCGGTCATCTCGGGCAGGTCTACAGTTTCCTGTTGGAAGAATCCATCGCCTCTTGAGGAAGGGTAATTATGCGGAGAGAATTGGAGCGGGAGCACCGGTGTATCTAGCTGCCGTGTTGGAATACCTTGGGGCGGAAGTCCTAGAATTGGCAGGGAATGCTGCGCGTGACAACAAGAAATCTCGCATCATTCCGCGCCATATTCAGCTGGCTATCAGAAACGACGAGGAGCTTAATAAGTTGCTGAGCGGCGTCACAATTTCACAGGGAGGTGTCCTGCCCAACATCCAAAATGCTCTCCTGCCAAAGAAAACCTCAAAGGGGCCAAAATCCGCGCCCTCTTCACAATCACAG…	histone H2A-like [Crassostrea gigas]	histone H2A-like; K11251 histone H2A (A)	Histone H2A OS=Asterias rubens PE=1 SV=2	H2A: 16-131	135	10.72	14.4387	-0.45
evm.model.ctg4484.13	ScH2B.1-1	ctg4484	20925	21299	+	MPAKGVASKGSKKAATKAKAARSTDKKKKRRRRESYSIYIYKVLKQVHPDTGVSSKAMSIMNSFVNDIFERIAAEASRLAHYNKRSTITSREIQTAVRLLLPGELAKHAVSEGTKAVTKYTSSK	ATGCCGGCTAAAGGAGTTGCAAGCAAGGGATCTAAGAAGGCCGCCACTAAGGCGAAGGCCGCCCGTTCCACAGACAAGAAGAAGAAGAGGAGGAGGAGGGAATCCTACTCTATCTACATCTACAAAGTCCTGAAGCAGGTGCACCCCGACACCGGTGTGTCCAGCAAGGCCATGTCAATTATGAACAGTTTCGTAAATGACATCTTTGAGAGAATCGCCGCTGAGGCCTCCCGTTTGGCTCACTACAACAAGAGATCCACCATCACCAGCAGAGAGATCCAGACAGCTGTCCGTCTCCTCCTGCCAGGTGAATTGGCCAAGCACGCTGTCAGCGAAGGCACCAAAGCCGTCACCAAGTACACCAGCAGCAAGTAA	cleavage stage histone H2B [Psammechinus miliaris]	histone H2B 7; K11252 histone H2B (A)	Histone H2B 7 OS=Gallus gallus GN=H2B-VII PE=1 SV=2	H2B: 34-123	124	10.52	13.7149	-0.624
evm.model.ctg4484.15	ScH2B.1-2	ctg4484	22942	23316	+	MPAKGVASKGSKKAATKAKAARSTDKKKKRRRRESYSIYIYKVLKQVHPDTGVSSKAMSIMNSFVNDIFERIAAEASRLAHYNKRSTITSREIQTAVRLLLPGELAKHAVSEGTKAVTKYTSSK	atgccggctaaaggagttgcaagcaagggatctaagaaggccgccactaaggcgaaggccgcccgttccacagacaagaagaagaagaggaggaggagggaatcctactctatctacatctacaaagtcctgaagcaggtgcaccccgacaccggtgtgtccagcaaggccatgtcaattatgaacagtttcgtaaatgacatctttgagagaatcgccgctgaggcctcccgtttggctcactacaacaagagatccaccatcaccagcagagagatccagacagctgtccgtctcctcctgccaggtgaattggccaagcacgctgtcagcgaaggcaccaaagccgtcaccaagtacaccagcagcaagtaa	cleavage stage histone H2B [Psammechinus miliaris]	histone H2B 7; K11252 histone H2B (A)	Histone H2B 7 OS=Gallus gallus GN=H2B-VII PE=1 SV=2	H2B: 34-123	124	10.52	13.7149	-0.624
evm.model.ctg4484.26	ScH2B.1-3	ctg4484	36500	36874	+	MPAKGVASKGSKKAATKAKAARSTDKKKKRRRRESYSIYIYKVLKQVHPDTGVSSKAMSIMNSFVNDIFERIAAEASRLAHYNKRSTITSREIQTAVRLLLPGELAKHAVSEGTKAVTKYTSSK	atgccggctaaaggagttgcaagcaagggatctaagaaggccgccactaaggcgaaggccgcccgttccacagacaagaagaagaagaggaggaggagggaatcctactctatctacatctacaaagtcctgaagcaggtgcaccccgacaccggtgtgtccagcaaggccatgtcaattatgaacagtttcgtaaatgacatctttgagagaatcgccgctgaggcctcccgtttggctcactacaacaagagatccaccatcaccagcagagagatccagacagctgtccgtctcctcctgccaggtgaattggccaagcacgctgtcagcgaaggcaccaaagccgtcaccaagtacaccagcagcaagtaa	cleavage stage histone H2B [Psammechinus miliaris]	histone H2B 7; K11252 histone H2B (A)	Histone H2B 7 OS=Gallus gallus GN=H2B-VII PE=1 SV=2	H2B: 34-123	124	10.52	13.7149	-0.624
evm.model.ctg5605.2	ScH2B.1-4	ctg5605	1939	2313	+	MPAKGVASKGSKKAATKAKAARSTDKKKKRRRRESYSIYIYKVLKQVHPDTGVSSKAMSIMNSFVNDIFERIAAEASRLAHYNKRSTITSREIQTAVRLLLPGELAKHAVSEGTKAVTKYTSSK	ATGCCAGCTAAAGGAGTTGCAAGCAAGGGGTCGAAGAAGGCCGCCACTAAGGCTAAGGCCGCCCGTTCCACCGACAAGAAGAAGAAGAGGAGGAGGAGGGAATCCTACTCTATCTACATCTACAAAGTTTTGAAGCAGGTGCACCCAGACACTGGTGTGTCCAGCAAGGCCATGTCAATCATGAACAGCTTCGTAAACGACATCTTTGAGAGAATCGCTGCTGAGGCCTCCCGCCTGGCCCACTACAACAAGCGATCCACCATCACCAGCAGAGAGATCCAGACCGCTGTCCGTCTACTCCTGCCCGGTGAACTGGCCAAGCACGCAGTCAGTGAAGGCACCAAGGCCGTCACCAAGTACACCAGCAGCAAGTAA	cleavage stage histone H2B [Psammechinus miliaris]	histone H2B 7; K11252 histone H2B (A)	Histone H2B 7 OS=Gallus gallus GN=H2B-VII PE=1 SV=2	H2B: 34-123	124	10.52	13.7149	-0.624
evm.model.ctg5605.7	ScH2B.1-5	ctg5605	8579	8953	+	MPAKGVASKGSKKAATKAKAARSTDKKKKRRRRESYSIYIYKVLKQVHPDTGVSSKAMSIMNSFVNDIFERIAAEASRLAHYNKRSTITSREIQTAVRLLLPGELAKHAVSEGTKAVTKYTSSK	ATGCCAGCTAAAGGAGTTGCAAGCAAGGGGTCGAAGAAGGCCGCCACTAAGGCTAAGGCCGCCCGTTCCACCGACAAGAAGAAGAAGAGGAGGAGGAGGGAATCCTACTCTATCTACATCTACAAAGTTTTGAAGCAGGTGCACCCAGACACTGGTGTGTCCAGCAAGGCCATGTCAATCATGAACAGCTTCGTAAACGACATCTTTGAGAGAATCGCTGCTGAGGCCTCCCGCCTGGCCCACTACAACAAGCGATCCACCATCACCAGCAGAGAGATCCAGACCGCTGTCCGTCTACTCCTGCCCGGTGAACTGGCCAAGCACGCAGTCAGTGAAGGCACCAAGGCCGTCACCAAGTACACCAGCAGCAAGTAA	cleavage stage histone H2B [Psammechinus miliaris]	histone H2B 7; K11252 histone H2B (A)	Histone H2B 7 OS=Gallus gallus GN=H2B-VII PE=1 SV=2	H2B: 34-123	124	10.52	13.7149	-0.624
evm.model.ctg5605.12	ScH2B.1-6	ctg5605	15238	15612	+	MPAKGVASKGSKKAATKAKAARSTDKKKKRRRRESYSIYIYKVLKQVHPDTGVSSKAMSIMNSFVNDIFERIAAEASRLAHYNKRSTITSREIQTAVRLLLPGELAKHAVSEGTKAVTKYTSSK	ATGCCAGCTAAAGGAGTTGCAAGCAAGGGGTCGAAGAAGGCCGCCACTAAGGCTAAGGCCGCCCGTTCCACCGACAAGAAGAAGAAGAGGAGGAGGAGGGAATCCTACTCTATCTACATCTACAAAGTTTTGAAGCAGGTGCACCCAGACACTGGTGTGTCCAGCAAGGCCATGTCAATCATGAACAGCTTCGTAAACGACATCTTTGAGAGAATCGCTGCTGAGGCCTCCCGCCTGGCCCACTACAACAAGCGATCCACCATCACCAGCAGAGAGATCCAGACCGCTGTCCGTCTACTCCTGCCCGGTGAACTGGCCAAGCACGCAGTCAGTGAAGGCACCAAGGCCGTCACCAAGTACACCAGCAGCAAGTAA	cleavage stage histone H2B [Psammechinus miliaris]	histone H2B 7; K11252 histone H2B (A)	Histone H2B 7 OS=Gallus gallus GN=H2B-VII PE=1 SV=2	H2B: 34-123	124	10.52	13.7149	-0.624
evm.model.ctg5749.7	ScH2B.1-7	ctg5749	12601	12975	-	MPAKGVASKGSKKAATKAKAARSTDKKKKRRRRESYSIYIYKVLKQVHPDTGVSSKAMSIMNSFVNDIFERIAAEASRLAHYNKRSTITSREIQTAVRLLLPGELAKHAVSEGTKAVTKYTSSK	atgccggctaaaggagttgcaagcaagggatctaagaaggccgccactaaggcgaaggccgcccgttccacagacaagaagaagaagaggaggaggagggaatcctactctatctacatctacaaagtcctgaagcaggtgcaccccgacaccggtgtgtccagcaaggccatgtcaattatgaacagtttcgtaaatgacatctttgagagaatcgccgctgaggcctcccgtttggcccactacaacaagagatccaccatcaccagcagagagatccagacagctgtccgtctcctcctgccaggtgaattggccaagcacgctgtcagcgaaggcaccaaagccgtcaccaagtacaccagcagcaagtaa	cleavage stage histone H2B [Psammechinus miliaris]	histone H2B 7; K11252 histone H2B (A)	Histone H2B 7 OS=Gallus gallus GN=H2B-VII PE=1 SV=2	H2B: 34-123	124	10.52	13.7149	-0.624
evm.model.ctg6665.17	ScH2B.1-8	ctg6665	29008	29382	-	MPAKGVASKGSKKAATKAKAARSTDKKKKRRRRESYSIYIYKVLKQVHPDTGVSSKAMSIMNSFVNDIFERIAAEASRLAHYNKRSTITSREIQTAVRLLLPGELAKHAVSEGTKAVTKYTSSK	atgccggctaaaggagttgcaagcaagggatctaagaaggccgccactaaggcgaaggccgcccgttccacagacaagaagaagaagaggaggaggagggaatcctactctatctacatctacaaagtcctgaagcaggtgcaccccgacaccggtgtgtccagcaaggccatgtcaattatgaacagtttcgtaaatgacatctttgagagaatcgccgctgaggcctcccgtttggctcactacaacaagagatccaccatcaccagcagagagatccagacagctgtccgtctcctcctgccaggtgaattggccaagcacgctgtcagcgaaggcaccaaagccgtcaccaagtacaccagcagcaagctgtacgcggccggccggccgccggcc…	cleavage stage histone H2B [Psammechinus miliaris]	histone H2B 7; K11252 histone H2B (A)	Histone H2B 7 OS=Gallus gallus GN=H2B-VII PE=1 SV=2	H2B: 34-123	124	10.52	13.7149	-0.624
evm.model.ctg6665.18	ScH2B.1-9	ctg6665	29999	30373	-	MPAKGVASKGSKKAATKAKAARSTDKKKKRRRRESYSIYIYKVLKQVHPDTGVSSKAMSIMNSFVNDIFERIAAEASRLAHYNKRSTITSREIQTAVRLLLPGELAKHAVSEGTKAVTKYTSSK	atgccggctaaaggagttgcaagcaagggatctaagaaggccgccactaaggcgaaggccgcccgttccacagacaagaagaagaagaggaggaggagggaatcctactctatctacatctacaaagtcctgaagcaggtgcaccccgacaccggtgtgtccagcaaggccatgtcaattatgaacagtttcgtaaatgacatctttgagagaatcgccgctgaggcctcccgtttggctcactacaacaagagatccaccatcaccagcagagagatccagacagctgtccgtctcctcctgccaggtgaattggccaagcacgctgtcagcgaaggcaccaaagccgtcaccaagtacaccagcagcaagtaa	cleavage stage histone H2B [Psammechinus miliaris]	histone H2B 7; K11252 histone H2B (A)	Histone H2B 7 OS=Gallus gallus GN=H2B-VII PE=1 SV=2	H2B: 34-123	124	10.52	13.7149	-0.624
evm.model.ctg6665.20	ScH2B.1-10	ctg6665	32526	32900	-	MPAKGVASKGSKKAATKAKAARSTDKKKKRRRRESYSIYIYKVLKQVHPDTGVSSKAMSIMNSFVNDIFERIAAEASRLAHYNKRSTITSREIQTAVRLLLPGELAKHAVSEGTKAVTKYTSSK	atgccggctaaaggagttgcaagcaagggatctaagaaggccgccactaaggcgaaggccgcccgttccacagacaagaagaagaagaggaggaggagggaatcctactctatctacatctacaaagtcctgaagcaggtgcaccccgacaccggtgtgtccagcaaggccatgtcaattatgaacagtttcgtaaatgacatctttgagagaatcgccgctgaggcctcccgtttggctcactacaacaagagatccaccatcaccagcagagagatccagacagctgtccgtctcctcctgccaggtgaattggccaagcacgctgtcagcgaaggcaccaaagccgtcaccaagtacaccagcagcaagtaa	cleavage stage histone H2B [Psammechinus miliaris]	histone H2B 7; K11252 histone H2B (A)	Histone H2B 7 OS=Gallus gallus GN=H2B-VII PE=1 SV=2	H2B: 34-123	124	10.52	13.7149	-0.624
evm.model.ctg6665.21	ScH2B.1-11	ctg6665	33717	34091	-	MPAKGVASKGSKKAATKAKAARSTDKKKKRRRRESYSIYIYKVLKQVHPDTGVSSKAMSIMNSFVNDIFERIAAEASRLAHYNKRSTITSREIQTAVRLLLPGELAKHAVSEGTKAVTKYTSSK	atgccggctaaaggagttgcaagcaagggatctaagaaggccgccactaaggcgaaggccgcccgttccacagacaagaagaagaagaggaggaggagggaatcctactctatctacatctacaaagtcctgaagcaggtgcaccccgacaccggtgtgtccagcaaggccatgtcaattatgaacagtttcgtaaatgacatctttgagagaatcgccgctgaggcctcccgtttggctcactacaacaagagatccaccatcaccagcagagagatccagacagctgtccgtctcctcctgccaggtgaattggccaagcacgctgtcagcgaaggcaccaaagccgtcaccaagtacaccagcagcaagtaa	cleavage stage histone H2B [Psammechinus miliaris]	histone H2B 7; K11252 histone H2B (A)	Histone H2B 7 OS=Gallus gallus GN=H2B-VII PE=1 SV=2	H2B: 34-123	124	10.52	13.7149	-0.624
evm.model.ctg6665.29	ScH2B.1-12	ctg6665	47484	47858	-	MPAKGVASKGSKKAATKAKAARSTDKKKKRRRRESYSIYIYKVLKQVHPDTGVSSKAMSIMNSFVNDIFERIAAEASRLAHYNKRSTITSREIQTAVRLLLPGELAKHAVSEGTKAVTKYTSSK	atgccggctaaaggagttgcaagcaagggatctaagaaggccgccactaaggcgaaggccgcccgttccacagacaagaagaagaagaggaggaggagggaatcctactctatctacatctacaaagtcctgaagcaggtgcaccccgacaccggtgtgtccagcaaggccatgtcaattatgaacagtttcgtaaatgacatctttgagagaatcgccgctgaggcctcccgtttggctcactacaacaagagatccaccatcaccagcagagagatccagacagctgtccgtctcctcctgccaggtgaattggccaagcacgctgtcagcgaaggcaccaaagccgtcaccaagtacaccagcagcaagtaa	cleavage stage histone H2B [Psammechinus miliaris]	histone H2B 7; K11252 histone H2B (A)	Histone H2B 7 OS=Gallus gallus GN=H2B-VII PE=1 SV=2	H2B: 34-123	124	10.52	13.7149	-0.624
evm.model.ctg7145.1	ScH2B.1-13	ctg7145	505	879	+	MPAKGVASKGSKKAATKAKAARSTDKKKKRRRRESYSIYIYKVLKQVHPDTGVSSKAMSIMNSFVNDIFERIAAEASRLAHYNKRSTITSREIQTAVRLLLPGELAKHAVSEGTKAVTKYTSSK	ATGCCAGCTAAAGGAGTTGCAAGCAAGGGGTCGAAGAAGGCCGCCACTAAGGCTAAGGCCGCCCGTTCCACCGACAAGAAGAAGAAGAGGAGGAGGAGGGAATCCTACTCTATCTACATCTACAAAGTTTTGAAGCAGGTGCACCCAGACACTGGTGTGTCCAGCAAGGCCATGTCAATCATGAACAGCTTCGTAAACGACATCTTTGAGAGAATCGCTGCTGAGGCCTCCCGCCTGGCCCACTACAACAAGCGATCCACCATCACCAGCAGAGAGATCCAGACCGCTGTCCGTCTACTCCTGCCCGGTGAACTGGCCAAGCACGCAGTCAGTGAAGGCACCAAGGCCGTCACCAAGTACACCAGCAGCAAGTAA	cleavage stage histone H2B [Psammechinus miliaris]	histone H2B 7; K11252 histone H2B (A)	Histone H2B 7 OS=Gallus gallus GN=H2B-VII PE=1 SV=2	H2B: 34-123	124	10.52	13.7149	-0.624
evm.model.ctg7145.4	ScH2B.1-14	ctg7145	8840	9214	+	MPAKGVASKGSKKAATKAKAARSTDKKKKRRRRESYSIYIYKVLKQVHPDTGVSSKAMSIMNSFVNDIFERIAAEASRLAHYNKRSTITSREIQTAVRLLLPGELAKHAVSEGTKAVTKYTSSK	atgccagctaaaggagttgcaagcaaggggtcgaagaaggccgccactaaggctaaggccgcccgttccaccgacaagaagaagaagaggaggaggagggaatcctactctatctacatctacaaagttttgaagcaggtgcacccagacactggtgtgtccagcaaggccatgtcaatcatgaacagcttcgtaaacgacatctttgagagaatcgctgctgaggcctcccgcctggcccactacaacaagcgatccaccatcaccagcagagagatccagaccgctgtccgtctactcctgcccggtgaactggccaagcacgcagtcagtgaaggcaccaaggccgtcaccaagtacaccagcagcaagtaa	cleavage stage histone H2B [Psammechinus miliaris]	histone H2B 7; K11252 histone H2B (A)	Histone H2B 7 OS=Gallus gallus GN=H2B-VII PE=1 SV=2	H2B: 34-123	124	10.52	13.7149	-0.624
evm.model.ctg7145.5	ScH2B.1-15	ctg7145	9879	10253	+	MPAKGVASKGSKKAATKAKAARSTDKKKKRRRRESYSIYIYKVLKQVHPDTGVSSKAMSIMNSFVNDIFERIAAEASRLAHYNKRSTITSREIQTAVRLLLPGELAKHAVSEGTKAVTKYTSSK	atgccagctaaaggagttgcaagcaaggggtcgaagaaggccgccactaaggctaaggccgcccgttccaccgacaagaagaagaagaggaggaggagggaatcctactctatctacatctacaaagttttgaagcaggtgcacccagacactggtgtgtccagcaaggccatgtcaatcatgaacagcttcgtaaacgacatctttgagagaatcgctgctgaggcctcccgcctggcccactacaacaagcgatccaccatcaccagcagagagatccagaccgctgtccgtctactcctgcccggtgaactggccaagcacgcagtcagtgaaggcaccaaggccgtcaccaagtacaccagcagcaagtaa	cleavage stage histone H2B [Psammechinus miliaris]	histone H2B 7; K11252 histone H2B (A)	Histone H2B 7 OS=Gallus gallus GN=H2B-VII PE=1 SV=2	H2B: 34-123	124	10.52	13.7149	-0.624
evm.model.ctg7342.20	ScH2B.1-16	ctg7342	32750	33124	+	MPAKGVASKGSKKAATKAKAARSTDKKKKRRRRESYSIYIYKVLKQVHPDTGVSSKAMSIMNSFVNDIFERIAAEASRLAHYNKRSTITSREIQTAVRLLLPGELAKHAVSEGTKAVTKYTSSK	atgccggctaaaggagttgcaagcaagggatctaagaaggccgccactaaggcgaaggccgcccgttccacagacaagaagaagaagaggaggaggagggaatcctactctatctacatctacaaagtcctgaagcaggtgcaccccgacaccggtgtgtccagcaaggccatgtcaattatgaacagtttcgtaaatgacatctttgagagaatcgccgctgaggcctcccgtttggctcactacaacaagagatccaccatcaccagcagagagatccagacagctgtccgtctcctcctgccaggtgaattggccaagcacgctgtcagcgaaggcaccaaagccgtcaccaagtacaccagcagcaagtaa	cleavage stage histone H2B [Psammechinus miliaris]	histone H2B 7; K11252 histone H2B (A)	Histone H2B 7 OS=Gallus gallus GN=H2B-VII PE=1 SV=2	H2B: 34-123	124	10.52	13.7149	-0.624
evm.model.ctg8547.4	ScH2B.1-17	ctg8547	6705	7079	-	MPAKGVASKGSKKAATKAKAARSTDKKKKRRRRESYSIYIYKVLKQVHPDTGVSSKAMSIMNSFVNDIFERIAAEASRLAHYNKRSTITSREIQTAVRLLLPGELAKHAVSEGTKAVTKYTSSK	atgccagctaaaggagttgcaagcaaggggtcgaagaaggccgccactaaggctaaggccgcccgttccaccgacaagaagaagaagaggaggaggagggaatcctactctatctacatctacaaagttttgaagcaggtgcacccagacactggtgtgtccagcaaggccatgtcaatcatgaacagcttcgtaaacgacatctttgagagaatcgctgctgaggcctcccgcctggcccactacaacaagcgatccaccatcaccagcagagagatccagaccgctgtccgtctactcctgcccggtgaactggccaagcacgcagtcagtgaaggcaccaaggccgtcaccaagtacaccagcagcaagtaa	cleavage stage histone H2B [Psammechinus miliaris]	histone H2B 7; K11252 histone H2B (A)	Histone H2B 7 OS=Gallus gallus GN=H2B-VII PE=1 SV=2	H2B: 34-123	124	10.52	13.7149	-0.624
evm.model.ctg8584.6	ScH2B.1-18	ctg8584	6593	6967	-	MPAKGVASKGSKKAATKAKAARSTDKKKKRRRRESYSIYIYKVLKQVHPDTGVSSKAMSIMNSFVNDIFERIAAEASRLAHYNKRSTITSREIQTAVRLLLPGELAKHAVSEGTKAVTKYTSSK	ATGCCAGCTAAAGGAGTTGCAAGCAAGGGGTCGAAGAAGGCCGCCACTAAGGCTAAGGCCGCCCGTTCCACCGACAAGAAGAAGAAGAGGAGGAGGAGGGAATCCTACTCTATCTACATCTACAAAGTTTTGAAGCAGGTGCACCCAGACACTGGTGTGTCCAGCAAGGCCATGTCAATCATGAACAGCTTCGTAAACGACATCTTTGAGAGAATCGCTGCTGAGGCCTCCCGCCTGGCCCACTACAACAAGCGATCCACCATCACCAGCAGAGAGATCCAGACCGCTGTCCGTCTACTCCTGCCCGGTGAACTGGCCAAGCACGCAGTCAGTGAAGGCACCAAGGCCGTCACCAAGTACACCAGCAGCAAGTAA	cleavage stage histone H2B [Psammechinus miliaris]	histone H2B 7; K11252 histone H2B (A)	Histone H2B 7 OS=Gallus gallus GN=H2B-VII PE=1 SV=2	H2B: 34-123	124	10.52	13.7149	-0.624
evm.model.ctg10813.5	ScH2B.1-19	ctg10813	5924	6298	-	MPAKGVASKGSKKAATKAKAARSTDKKKKRRRRESYSIYIYKVLKQVHPDTGVSSKAMSIMNSFVNDIFERIAAEASRLAHYNKRSTITSREIQTAVRLLLPGELAKHAVSEGTKAVTKYTSSK	ATGCCAGCTAAAGGAGTTGCAAGCAAGGGGTCGAAGAAGGCCGCCACTAAGGCTAAGGCCGCCCGTTCCACCGACAAGAAGAAGAAGAGGAGGAGGAGGGAATCCTACTCTATCTACATCTACAAAGTTTTGAAGCAGGTGCACCCAGACACTGGTGTGTCCAGCAAGGCCATGTCAATCATGAACAGCTTCGTAAACGACATCTTTGAGAGAATCGCTGCTGAGGCCTCCCGCCTGGCCCACTACAACAAGCGATCCACCATCACCAGCAGAGAGATCCAGACCGCTGTCCGTCTACTCCTGCCCGGTGAACTGGCCAAGCACGCAGTCAGTGAAGGCACCAAGGCCGTCACCAAGTACACCAGCAGCAAGTAA	cleavage stage histone H2B [Psammechinus miliaris]	histone H2B 7; K11252 histone H2B (A)	Histone H2B 7 OS=Gallus gallus GN=H2B-VII PE=1 SV=2	H2B: 34-123	124	10.52	13.7149	-0.624
evm.model.ctg1356.9	ScH2B.1-20	Hic_asm_1	74151176	74151550	-	MPAKGVASKGSKKAATKAKAARSTDKKKKRRRRESYSIYIYKVLKQVHPDTGVSSKAMSIMNSFVNDIFERIAAEASRLAHYNKRSTITSREIQTAVRLLLPGELAKHAVSEGTKAVTKYTSSK	ATGCCAGCTAAAGGAGTTGCAAGCAAGGGGTCGAAGAAGGCCGCCACTAAGGCTAAGGCCGCCCGTTCCACCGACAAGAAGAAGAAGAGGAGGAGGAGGGAATCCTACTCTATCTACATCTACAAAGTTTTGAAGCAGGTGCACCCAGACACTGGTGTGTCCAGCAAGGCCATGTCAATCATGAACAGCTTCGTAAACGACATCTTTGAGAGAATCGCTGCTGAGGCCTCCCGCCTGGCCCACTACAACAAGCGATCCACCATCACCAGCAGAGAGATCCAGACCGCTGTCCGTCTACTCCTGCCCGGTGAACTGGCCAAGCACGCAGTCAGTGAAGGCACCAAGGCCGTCACCAAGTACACCAGCAGCAAGTAA	cleavage stage histone H2B [Psammechinus miliaris]	histone H2B 7; K11252 histone H2B (A)	Histone H2B 7 OS=Gallus gallus GN=H2B-VII PE=1 SV=2	H2B: 34-123	124	10.52	13.7149	-0.624
evm.model.ctg1311.4	ScH2B.1-21	Hic_asm_1	74834541	74834915	+	MPAKGVASKGSKKAATKAKAARSTDKKKKRRRRESYSIYIYKVLKQVHPDTGVSSKAMSIMNSFVNDIFERIAAEASRLAHYNKRSTITSREIQTAVRLLLPGELAKHAVSEGTKAVTKYTSSK	ATGCCAGCTAAAGGAGTTGCAAGCAAGGGGTCGAAGAAGGCCGCCACTAAGGCTAAGGCCGCCCGTTCCACCGACAAGAAGAAGAAGAGGAGGAGGAGGGAATCCTACTCTATCTACATCTACAAAGTTTTGAAGCAGGTGCACCCAGACACTGGTGTGTCCAGCAAGGCCATGTCAATCATGAACAGCTTCGTAAACGACATCTTTGAGAGAATCGCTGCTGAGGCCTCCCGCCTGGCCCACTACAACAAGCGATCCACCATCACCAGCAGAGAGATCCAGACCGCTGTCCGTCTACTCCTGCCCGGTGAACTGGCCAAGCACGCAGTCAGTGAAGGCACCAAGGCCGTCACCAAGTACACCAGCAGCAAGTAA	cleavage stage histone H2B [Psammechinus miliaris]	histone H2B 7; K11252 histone H2B (A)	Histone H2B 7 OS=Gallus gallus GN=H2B-VII PE=1 SV=2	H2B: 34-123	124	10.52	13.7149	-0.624
evm.model.ctg1371.8	ScH2B.1-22	Hic_asm_1	75227673	75228047	-	MPAKGVASKGSKKAATKAKAARSTDKKKKRRRRESYSIYIYKVLKQVHPDTGVSSKAMSIMNSFVNDIFERIAAEASRLAHYNKRSTITSREIQTAVRLLLPGELAKHAVSEGTKAVTKYTSSK	ATGCCAGCTAAAGGAGTTGCAAGCAAGGGGTCGAAGAAGGCCGCCACTAAGGCTAAGGCCGCCCGTTCCACCGACAAGAAGAAGAAGAGGAGGAGGAGGGAATCCTACTCTATCTACATCTACAAAGTTTTGAAGCAGGTGCACCCAGACACTGGTGTGTCCAGCAAGGCCATGTCAATCATGAACAGCTTCGTAAACGACATCTTTGAGAGAATCGCTGCTGAGGCCTCCCGCCTGGCCCACTACAACAAGCGATCCACCATCACCAGCAGAGAGATCCAGACCGCTGTCCGTCTACTCCTGCCCGGTGAACTGGCCAAGCACGCAGTCAGTGAAGGCACCAAGGCCGTCACCAAGTACACCAGCAGCAAGTAA	cleavage stage histone H2B [Psammechinus miliaris]	histone H2B 7; K11252 histone H2B (A)	Histone H2B 7 OS=Gallus gallus GN=H2B-VII PE=1 SV=2	H2B: 34-123	124	10.52	13.7149	-0.624
evm.model.ctg4484.8	ScH2B.2	ctg4484	9346	9718	+	MPAKGVASKGSKKAATKAKAARSTDKKKKRRRRESYSIYIYKVLKQVHPDTGVSSKAMSIMNSFVNDIFERIAAEASRLAHYNKRSTITSREIQTAVRLLLPGELAKHAVSEGTKAVTSTPAAS	ATGCCGGCTAAAGGAGTTGCAAGCAAGGGATCTAAGAAGGCCGCCACTAAGGCGAAGGCCGCCCGTTCCACAGACAAGAAGAAGAAGAGGAGGAGGAGGGAATCCTACTCTATCTACATCTACAAAGTCCTGAAGCAGGTGCACCCCGACACCGGTGTGTCCAGCAAGGCCATGTCAATTATGAACAGTTTCGTAAATGACATCTTTGAGAGAATCGCCGCTGAGGCCTCCCGTTTGGCTCACTACAACAAGAGATCCACCATCACCAGCAGAGAGATCCAGACAGCTGTCCGTCTCCTCCTGCCAGGTGAATTGGCCAAGCACGCTGTCAGCGAAGGCACCAAAGCCGTCACCAGTACACCAGCAGCAAGTAATTTGCTCAGGCACTTTGCTTATCAA…	cleavage stage histone H2B [Psammechinus miliaris]	histone H2B 7; K11252 histone H2B (A)	Histone H2B 7 OS=Gallus gallus GN=H2B-VII PE=1 SV=2	H2B: 34-118	124	10.43	16.9056	-0.535
evm.model.ctg8773.1	ScH2B.3	ctg8773	4323	4690	-	MPAKGVASKGSKKAATKAKAARSTDKKKRRRRESYSIYIYKVLKQVHPDTGVSSKAMSIMNSFVNDIFERIAAEASRLAHYNKRSTITSREIQTAVRLLLPGELAKHAVSEGTKAVTKYTSS	atgccggctaaaggagttgcaagcaagggatctaagaaggccgccactaaggcgaaggccgcccgttccacagacaagaagaagaggaggaggagggaatcctactctatctacatctacaaagtcctgaagcaggtgcaccccgacaccggtgtgtccagcaaggccatgtcaattatgaacagtttcgtaaatgacatctttgagagaatcgccgctgaggcctcccgtttggctcactacaacaagagatccaccatcaccagcagagagatccagacagctgtccgtctcctcctgccaggtgaattggccaagcacgctgtcagcgaaggcaccaaagccgtcaccaagtacaccagcagcaa	cleavage stage histone H2B [Psammechinus miliaris]	histone H2B 1/2-like; K11252 histone H2B (A)	Histone H2B 1/2 OS=Danio rerio GN=zgc:112234 PE=2 SV=3	H2B: 26-121	122	10.47	13.4586	-0.57
evm.model.ctg10509.3	ScH2B.4	ctg10509	9071	9442	+	MPAKGVASKGSKKAATKAKAARSTDKKKKRRRRESYSIYIYKVLKQVHPDTGVSSKAMSIMNSFVNDIFERIAAEASRLAHYNKRSTITSREIQTAVRLLLPGELAKHAVSEGTKGRHQVHQQQ	ATGCCAGCTAAAGGAGTTGCAAGCAAGGGGTCGAAGAAGGCCGCCACTAAGGCTAAGGCCGCCCGTTCCACCGACAAGAAGAAGAAGAGGAGGAGGAGGGAATCCTACTCTATCTACATCTACAAAGTTTTGAAGCAGGTGCACCCAGACACTGGTGTGTCCAGCAAGGCCATGTCAATCATGAACAGCTTCGTAAACGACATCTTTGAGAGAATCGCTGCTGAGGCCTCCCGCCTGGCCCACTACAACAAGCGATCCACCATCACCAGCAGAGAGATCCAGACCGCTGTCCGTCTACTCCTGCCCGGTGAACTGGCCAAGCACGCAGTCAGTGAAGGCACCAAGGGCCGTCACCAAGTACACCAGCAGCAA	cleavage stage histone H2B [Psammechinus miliaris]	histone H2B 7; K11252 histone H2B (A)	Histone H2B 7 OS=Gallus gallus GN=H2B-VII PE=1 SV=2	H2B: 34-115	124	10.67	13.848	-0.745
evm.model.ctg4484.5	ScH3.1-1	ctg4484	5403	5813	+	MARTKQTARKSTGGKAPRKQLATKAARKSAPATGGVKKPHRYRPGTVALREIRRYQKSTELLIRKLPFQRLVREIAQDFKTDLRFQSSAVMALQEASEAYLVGLFEDTNLCAIHAKRVTIMPKDIQLARRIRGERA	ATGGCGAGAACCAAGCAGACTGCACGAAAATCCACCGGAGGAAAGGCTCCCCGCAAGCAGCTGGCCACTAAGGCCGCTCGTAAGAGCGCACCAGCCACCGGTGGAGTGAAGAAGCCCCACAGGTACAGGCCCGGTACCGTCGCTCTTCGTGAGATTCGTAGATACCAGAAGAGCACTGAGCTGTTGATCAGGAAACTGCCATTCCAGCGTCTGGTCAGGGAAATCGCCCAGGACTTCAAGACAGACCTTCGCTTCCAGAGCTCAGCCGTCATGGCCCTTCAGGAGGCCAGCGAGGCCTACCTGGTTGGTCTTTTTGAGGACACCAACCTCTGCGCCATCCACGCCAAGCGTGTCACCATCATGCCAAAGGACATCCAGCTGGCTCGCCGCATCCGTGGA…	Histone H3c [Culex quinquefasciatus]	Histone H3c; K11253 histone H3 (A)	Histone H3 OS=Urechis caupo PE=1 SV=2	H3: 1-136	136	11.27	15.388	-0.604
evm.model.ctg4484.24	ScH3.1-2	ctg4484	32681	33091	+	MARTKQTARKSTGGKAPRKQLATKAARKSAPATGGVKKPHRYRPGTVALREIRRYQKSTELLIRKLPFQRLVREIAQDFKTDLRFQSSAVMALQEASEAYLVGLFEDTNLCAIHAKRVTIMPKDIQLARRIRGERA	atggcgagaaccaagcagactgcacgaaaatccaccggaggaaaggctccccgcaagcagctggccactaaggccgctcgtaagagcgcaccagccaccggtggagtgaagaagccccacaggtacaggcccggtaccgtcgctcttcgtgagattcgtagataccagaagagcactgagctgttgatcaggaaactgccattccagcgtctggtcagggaaatcgcccaggacttcaagacagaccttcgcttccagagctcagccgtcatggcccttcaggaggccagcgaggcctacctggttggtctttttgaggacaccaacctctgcgccatccacgccaagcgtgtcaccatcatgccaaaggacatccagctggctcgccgcatccgtgga…	Histone H3c [Culex quinquefasciatus]	Histone H3c; K11253 histone H3 (A)	Histone H3 OS=Urechis caupo PE=1 SV=2	H3: 1-136	136	11.27	15.388	-0.604
evm.model.ctg5055.1	ScH3.1-3	ctg5055	330	740	+	MARTKQTARKSTGGKAPRKQLATKAARKSAPATGGVKKPHRYRPGTVALREIRRYQKSTELLIRKLPFQRLVREIAQDFKTDLRFQSSAVMALQEASEAYLVGLFEDTNLCAIHAKRVTIMPKDIQLARRIRGERA	atggcgagaaccaagcagaccgcaagaaaatccaccggaggcaaggctccacgaaagcagctggctaccaaggccgctcgtaagagcgcaccagccactggtggagtgaagaaaccccacaggtacaggcccggtaccgtcgctcttcgtgaaatccgtagataccagaagagcactgagcttttgatcaggaaactgccattccagcgtctggtcagagaaatcgcccaggatttcaagactgacctccgattccagagctcagccgtcatggccctccaggaggccagcgaggcctacctggttggtctcttcgaggataccaacctgtgcgccatccacgccaagcgtgtcaccatcatgccaaaggacattcagctcgctcgccgtattcgtgga…	Histone H3c [Culex quinquefasciatus]	Histone H3c; K11253 histone H3 (A)	Histone H3 OS=Urechis caupo PE=1 SV=2	H3: 1-136	136	11.27	15.388	-0.604
evm.model.ctg5605.5	ScH3.1-4	ctg5605	6434	6844	+	MARTKQTARKSTGGKAPRKQLATKAARKSAPATGGVKKPHRYRPGTVALREIRRYQKSTELLIRKLPFQRLVREIAQDFKTDLRFQSSAVMALQEASEAYLVGLFEDTNLCAIHAKRVTIMPKDIQLARRIRGERA	ATGGCGAGAACCAAGCAGACCGCAAGAAAATCCACCGGAGGCAAGGCTCCACGAAAGCAGCTGGCTACCAAGGCCGCTCGTAAGAGCGCACCAGCCACTGGTGGAGTGAAGAAACCCCACAGGTACAGGCCCGGTACCGTCGCTCTTCGTGAAATCCGTAGATACCAGAAGAGCACTGAGCTTTTGATCAGGAAACTGCCATTCCAGCGTCTGGTCAGAGAAATCGCCCAGGACTTCAAGACTGACCTCCGATTCCAGAGCTCAGCCGTCATGGCCCTCCAGGAGGCCAGCGAGGCCTACCTGGTTGGTCTCTTCGAGGATACCAACCTGTGCGCCATCCACGCCAAGCGTGTCACCATCATGCCAAAGGACATTCAGCTCGCTCGCCGTATTCGTGGA…	Histone H3c [Culex quinquefasciatus]	Histone H3c; K11253 histone H3 (A)	Histone H3 OS=Urechis caupo PE=1 SV=2	H3: 1-136	136	11.27	15.388	-0.604
evm.model.ctg5605.10	ScH3.1-5	ctg5605	13092	13502	+	MARTKQTARKSTGGKAPRKQLATKAARKSAPATGGVKKPHRYRPGTVALREIRRYQKSTELLIRKLPFQRLVREIAQDFKTDLRFQSSAVMALQEASEAYLVGLFEDTNLCAIHAKRVTIMPKDIQLARRIRGERA	ATGGCGAGAACCAAGCAGACCGCAAGAAAATCCACCGGAGGCAAGGCTCCACGAAAGCAGCTGGCTACCAAGGCCGCTCGTAAGAGCGCACCAGCCACTGGTGGAGTGAAGAAACCCCACAGGTACAGGCCCGGTACCGTCGCTCTTCGTGAAATCCGTAGATACCAGAAGAGCACTGAGCTTTTGATCAGGAAACTGCCATTCCAGCGTCTGGTCAGAGAAATCGCCCAGGACTTCAAGACTGACCTCCGATTCCAGAGCTCAGCCGTCATGGCCCTCCAGGAGGCCAGCGAGGCCTACCTGGTTGGTCTCTTCGAGGATACCAACCTGTGCGCCATCCACGCCAAGCGTGTCACCATCATGCCAAAGGACATTCAGCTCGCTCGCCGTATTCGTGGA…	Histone H3, partial [Acromyrmex echinatior]	Histone H3c; K11253 histone H3 (A)	Histone H3 OS=Urechis caupo PE=1 SV=2	H3: 1-136	136	10.99	19.8974	-0.399
evm.model.ctg5749.11	ScH3.1-6	ctg5749	17053	17463	-	MARTKQTARKSTGGKAPRKQLATKAARKSAPATGGVKKPHRYRPGTVALREIRRYQKSTELLIRKLPFQRLVREIAQDFKTDLRFQSSAVMALQEASEAYLVGLFEDTNLCAIHAKRVTIMPKDIQLARRIRGERA	atggcgagaaccaagcagactgcacgaaaatccaccggaggaaaggctccccgcaagcagctggccactaaggccgctcgtaagagcgcaccagccaccggtggagtgaagaagccccacaggtacaggcccggtaccgtcgctcttcgtgagattcgtagataccagaagagcactgagctgttgatcaggaaactgccattccagcgtctggtcagggaaatcgcccaggacttcaagacagaccttcgcttccagagctcagccgtcatggcccttcaggaggccagcgaggcctacctggttggtctttttgaggacaccaacctctgcgccatccacgccaagcgtgtcaccatcatgccaaaggacatccagctggctcgccgcatccgtgga…	Histone H3c [Culex quinquefasciatus]	Histone H3c; K11253 histone H3 (A)	Histone H3 OS=Urechis caupo PE=1 SV=2	H3: 1-136	136	11.27	15.388	-0.604
evm.model.ctg6245.1	ScH3.1-7	ctg6245	863	1273	+	MARTKQTARKSTGGKAPRKQLATKAARKSAPATGGVKKPHRYRPGTVALREIRRYQKSTELLIRKLPFQRLVREIAQDFKTDLRFQSSAVMALQEASEAYLVGLFEDTNLCAIHAKRVTIMPKDIQLARRIRGERA	atggcgagaaccaagcagactgcacgaaaatccaccggaggaaaggctccccgcaagcagctggccactaaggccgctcgtaagagcgcaccagccaccggtggagtgaagaagccccacaggtacaggcccggtaccgtcgctcttcgtgagattcgtagataccagaagagcactgagctgttgatcaggaaactgccattccagcgtctggtcagggaaatcgcccaggacttcaagacagaccttcgcttccagagctcagccgtcatggcccttcaggaggccagcgaggcctacctggttggtctttttgaggacaccaacctctgcgccatccacgccaagcgtgtcaccatcatgccaaaggacatccagctggctcgccgcatccgtgga…	Histone H3c [Culex quinquefasciatus]	Histone H3c; K11253 histone H3 (A)	Histone H3 OS=Urechis caupo PE=1 SV=2	H3: 1-136	136	11.27	15.388	-0.604
evm.model.ctg6665.25	ScH3.1-8	ctg6665	38328	38738	-	MARTKQTARKSTGGKAPRKQLATKAARKSAPATGGVKKPHRYRPGTVALREIRRYQKSTELLIRKLPFQRLVREIAQDFKTDLRFQSSAVMALQEASEAYLVGLFEDTNLCAIHAKRVTIMPKDIQLARRIRGERA	atggcgagaaccaagcagactgcacgaaaatccaccggaggaaaggctccccgcaagcagctggccactaaggccgctcgtaagagcgcaccagccaccggtggagtgaagaagccccacaggtacaggcccggtaccgtcgctcttcgtgagattcgtagataccagaagagcactgagctgttgatcaggaaactgccattccagcgtctggtcagggaaatcgcccaggacttcaagacagaccttcgcttccagagctcagccgtcatggcccttcaggaggccagcgaggcctacctggttggtctttttgaggacaccaacctctgcgccatccacgccaagcgtgtcaccatcatgccaaaggacatccagctggctcgccgcatccgtgga…	Histone H3c [Culex quinquefasciatus]	Histone H3c; K11253 histone H3 (A)	Histone H3 OS=Urechis caupo PE=1 SV=2	H3: 1-136	136	11.27	15.388	-0.604
evm.model.ctg7145.8	ScH3.1-9	ctg7145	17855	18265	+	MARTKQTARKSTGGKAPRKQLATKAARKSAPATGGVKKPHRYRPGTVALREIRRYQKSTELLIRKLPFQRLVREIAQDFKTDLRFQSSAVMALQEASEAYLVGLFEDTNLCAIHAKRVTIMPKDIQLARRIRGERA	atggcgagaaccaagcagaccgcaagaaaatccaccggaggcaaggctccacgaaagcagctggctaccaaggccgctcgtaagagcgcaccagccactggtggagtgaagaaaccccacaggtacaggcccggtaccgtcgctcttcgtgaaatccgtagataccagaagagcactgagcttttgatcaggaaactgccattccagcgtctggtcagagaaatcgcccaggacttcaagactgacctccgattccagagctcagccgtcatggccctccaggaggccagcgaggcctacctggttggtctcttcgaggataccaacctgtgcgccatccacgccaagcgtgtcaccatcatgccaaaggacattcagctcgctcgccgtattcgtgga…	Histone H3, partial [Acromyrmex echinatior]	Histone H3c; K11253 histone H3 (A)	Histone H3 OS=Urechis caupo PE=1 SV=2	H3: 1-136	136	10.99	19.8974	-0.399
evm.model.ctg7342.7	ScH3.1-10	ctg7342	13233	13643	+	MARTKQTARKSTGGKAPRKQLATKAARKSAPATGGVKKPHRYRPGTVALREIRRYQKSTELLIRKLPFQRLVREIAQDFKTDLRFQSSAVMALQEASEAYLVGLFEDTNLCAIHAKRVTIMPKDIQLARRIRGERA	atggcgagaaccaagcagactgcacgaaaatccaccggaggaaaggctccccgcaagcagctggccactaaggccgctcgtaagagcgcaccagccaccggtggagtgaagaagccccacaggtacaggcccggtaccgtcgctcttcgtgagattcgtagataccagaagagcactgagctgttgatcaggaaactgccattccagcgtctggtcagggaaatcgcccaggacttcaagacagaccttcgcttccagagctcagccgtcatggcccttcaggaggccagcgaggcctacctggttggtctttttgaggacaccaacctctgcgccatccacgccaagcgtgtcaccatcatgccaaaggacatccagctggctcgccgcatccgtgga…	Histone H3c [Culex quinquefasciatus]	Histone H3c; K11253 histone H3 (A)	Histone H3 OS=Urechis caupo PE=1 SV=2	H3: 1-136	136	11.27	15.388	-0.604
evm.model.ctg7342.25	ScH3.1-11	ctg7342	42084	42494	+	MARTKQTARKSTGGKAPRKQLATKAARKSAPATGGVKKPHRYRPGTVALREIRRYQKSTELLIRKLPFQRLVREIAQDFKTDLRFQSSAVMALQEASEAYLVGLFEDTNLCAIHAKRVTIMPKDIQLARRIRGERA	atggcgagaaccaagcagactgcacgaaaatccaccggaggaaaggctccccgcaagcagctggccactaaggccgctcgtaagagcgcaccagccaccggtggagtgaagaagccccacaggtacaggcccggtaccgtcgctcttcgtgagattcgtagataccagaagagcactgagctgttgatcaggaaactgccattccagcgtctggtcagggaaatcgcccaggacttcaagacagaccttcgcttccagagctcagccgtcatggcccttcaggaggccagcgaggcctacctggttggtctttttgaggacaccaacctctgcgccatccacgccaagcgtgtcaccatcatgccaaaggacatccagctggctcgccgcatccgtgga…	Histone H3c [Culex quinquefasciatus]	Histone H3c; K11253 histone H3 (A)	Histone H3 OS=Urechis caupo PE=1 SV=2	H3: 1-136	136	11.27	15.388	-0.604
evm.model.ctg8584.3	ScH3.1-12	ctg8584	2039	2449	-	MARTKQTARKSTGGKAPRKQLATKAARKSAPATGGVKKPHRYRPGTVALREIRRYQKSTELLIRKLPFQRLVREIAQDFKTDLRFQSSAVMALQEASEAYLVGLFEDTNLCAIHAKRVTIMPKDIQLARRIRGERA	ATGGCGAGAACCAAGCAGACCGCAAGAAAATCCACCGGAGGCAAGGCTCCACGAAAGCAGCTGGCTACCAAGGCCGCTCGTAAGAGCGCACCAGCCACTGGTGGAGTGAAGAAACCCCACAGGTACAGGCCCGGTACCGTCGCTCTTCGTGAAATCCGTAGATACCAGAAGAGCACTGAGCTTTTGATCAGGAAACTGCCATTCCAGCGTCTGGTCAGAGAAATCGCCCAGGATTTCAAGACTGACCTCCGATTCCAGAGCTCAGCCGTCATGGCCCTCCAGGAGGCCAGCGAGGCCTACCTGGTTGGTCTCTTCGAGGATACCAACCTGTGCGCCATCCACGCCAAGCGTGTCACCATCATGCCAAAGGACATTCAGCTCGCTCGCCGTATTCGTGGA…	Histone H3c [Culex quinquefasciatus]	Histone H3c; K11253 histone H3 (A)	Histone H3 OS=Urechis caupo PE=1 SV=2	H3: 1-136	136	11.27	15.388	-0.604
evm.model.ctg10509.1	ScH3.1-13	ctg10509	6923	7333	+	MARTKQTARKSTGGKAPRKQLATKAARKSAPATGGVKKPHRYRPGTVALREIRRYQKSTELLIRKLPFQRLVREIAQDFKTDLRFQSSAVMALQEASEAYLVGLFEDTNLCAIHAKRVTIMPKDIQLARRIRGERA	ATGGCGAGAACCAAGCAGACCGCAAGAAAATCCACCGGAGGCAAGGCTCCACGAAAGCAGCTGGCTACCAAGGCCGCTCGTAAGAGCGCACCAGCCACTGGTGGAGTGAAGAAACCCCACAGGTACAGGCCCGGTACCGTCGCTCTTCGTGAAATCCGTAGATACCAGAAGAGCACTGAGCTTTTGATCAGGAAACTGCCATTCCAGCGTCTGGTCAGAGAAATCGCCCAGGACTTCAAGACTGACCTCCGATTCCAGAGCTCAGCCGTCATGGCCCTCCAGGAGGCCAGCGAGGCCTACCTGGTTGGTCTCTTCGAGGATACCAACCTGTGCGCCATCCACGCCAAGCGTGTCACCATCATGCCAAAGGACATTCAGCTCGCTCGCCGTATTCGTGGA…	Histone H3c [Culex quinquefasciatus]	Histone H3c; K11253 histone H3 (A)	Histone H3 OS=Urechis caupo PE=1 SV=2	H3: 1-136	136	11.27	15.388	-0.604
evm.model.ctg10592.1	ScH3.1-14	ctg10592	1771	2181	-	MARTKQTARKSTGGKAPRKQLATKAARKSAPATGGVKKPHRYRPGTVALREIRRYQKSTELLIRKLPFQRLVREIAQDFKTDLRFQSSAVMALQEASEAYLVGLFEDTNLCAIHAKRVTIMPKDIQLARRIRGERA	atggcgagaaccaagcagaccgcaagaaaatccaccggaggcaaggctccacgaaagcagctggctaccaaggccgctcgtaagagcgcaccagccactggtggagtgaagaaaccccacaggtacaggcccggtaccgtcgctcttcgtgaaatccgtagataccagaagagcactgagcttttgatcaggaaactgccattccagcgtctggtcagagaaatcgcccaggacttcaagactgacctccgattccagagctcagccgtcatggccctccaggaggccagcgaggcctacctggttggtctcttcgaggataccaacctgtgcgccatccacgccaagcgtgtcaccatcatgccaaaggacattcagctcgctcgccgtattcgtgga…	Histone H3c [Culex quinquefasciatus]	Histone H3c; K11253 histone H3 (A)	Histone H3 OS=Urechis caupo PE=1 SV=2	H3: 1-136	136	11.27	15.388	-0.604
evm.model.ctg10813.2	ScH3.1-15	ctg10813	1366	1776	-	MARTKQTARKSTGGKAPRKQLATKAARKSAPATGGVKKPHRYRPGTVALREIRRYQKSTELLIRKLPFQRLVREIAQDFKTDLRFQSSAVMALQEASEAYLVGLFEDTNLCAIHAKRVTIMPKDIQLARRIRGERA	ATGGCGAGAACCAAGCAGACCGCAAGAAAATCCACCGGAGGCAAGGCTCCACGAAAGCAGCTGGCTACCAAGGCCGCTCGTAAGAGCGCACCAGCCACTGGTGGAGTGAAGAAACCCCACAGGTACAGGCCCGGTACCGTCGCTCTTCGTGAAATCCGTAGATACCAGAAGAGCACTGAGCTTTTGATCAGGAAACTGCCATTCCAGCGTCTGGTCAGAGAAATCGCCCAGGACTTCAAGACTGACCTCCGATTCCAGAGCTCAGCCGTCATGGCCCTCCAGGAGGCCAGCGAGGCCTACCTGGTTGGTCTCTTCGAGGATACCAACCTGTGCGCCATCCACGCCAAGCGTGTCACCATCATGCCAAAGGACATTCAGCTCGCTCGCCGTATTCGTGGA…	Histone H3c [Culex quinquefasciatus]	Histone H3c; K11253 histone H3 (A)	Histone H3 OS=Urechis caupo PE=1 SV=2	H3: 1-136	136	11.27	15.388	-0.604
evm.model.ctg10813.7	ScH3.1-16	ctg10813	8036	8446	-	MARTKQTARKSTGGKAPRKQLATKAARKSAPATGGVKKPHRYRPGTVALREIRRYQKSTELLIRKLPFQRLVREIAQDFKTDLRFQSSAVMALQEASEAYLVGLFEDTNLCAIHAKRVTIMPKDIQLARRIRGERA	ATGGCGAGAACCAAGCAGACCGCAAGAAAATCCACCGGAGGCAAGGCTCCACGAAAGCAGCTGGCTACCAAGGCCGCTCGTAAGAGCGCACCAGCCACTGGTGGAGTGAAGAAACCCCACAGGTACAGGCCCGGTACCGTCGCTCTTCGTGAAATCCGTAGATACCAGAAGAGCACTGAGCTTTTGATCAGGAAACTGCCATTCCAGCGTCTGGTCAGAGAAATCGCCCAGGACTTCAAGACTGACCTCCGATTCCAGAGCTCAGCCGTCATGGCCCTCCAGGAGGCCAGCGAGGCCTACCTGGTTGGTCTCTTCGAGGATACCAACCTGTGCGCCATCCACGCCAAGCGTGTCACCATCATGCCAAAGGACATTCAGCTCGCTCGCCGTATTCGTGGA…	Histone H3c [Culex quinquefasciatus]	Histone H3c; K11253 histone H3 (A)	Histone H3 OS=Urechis caupo PE=1 SV=2	H3: 1-136	136	11.27	15.388	-0.604
evm.model.ctg1356.7	ScH3.1-17	Hic_asm_1	74153296	74153706	-	MARTKQTARKSTGGKAPRKQLATKAARKSAPATGGVKKPHRYRPGTVALREIRRYQKSTELLIRKLPFQRLVREIAQDFKTDLRFQSSAVMALQEASEAYLVGLFEDTNLCAIHAKRVTIMPKDIQLARRIRGERA	ATGGCGAGAACCAAGCAGACCGCAAGAAAATCCACCGGAGGCAAGGCTCCACGAAAGCAGCTGGCTACCAAGGCCGCTCGTAAGAGCGCACCAGCCACTGGTGGAGTGAAGAAACCCCACAGGTACAGGCCCGGTACCGTCGCTCTTCGTGAAATCCGTAGATACCAGAAGAGCACTGAGCTTTTGATCAGGAAACTGCCATTCCAGCGTCTGGTCAGAGAAATCGCCCAGGATTTCAAGACTGACCTCCGATTCCAGAGCTCAGCCGTCATGGCCCTCCAGGAGGCCAGCGAGGCCTACCTGGTTGGTCTCTTCGAGGATACCAACCTGTGCGCCATCCACGCCAAGCGTGTCACCATCATGCCAAAGGACATTCAGCTCGCTCGCCGTATTCGTGGA…	Histone H3c [Culex quinquefasciatus]	Histone H3c; K11253 histone H3 (A)	Histone H3 OS=Urechis caupo PE=1 SV=2	H3: 1-136	136	11.27	15.388	-0.604
evm.model.ctg1311.2	ScH3.1-18	Hic_asm_1	74832384	74832794	+	MARTKQTARKSTGGKAPRKQLATKAARKSAPATGGVKKPHRYRPGTVALREIRRYQKSTELLIRKLPFQRLVREIAQDFKTDLRFQSSAVMALQEASEAYLVGLFEDTNLCAIHAKRVTIMPKDIQLARRIRGERA	ATGGCGAGAACCAAGCAGACCGCAAGAAAATCCACCGGAGGCAAGGCTCCACGAAAGCAGCTGGCTACCAAGGCCGCTCGTAAGAGCGCACCAGCCACTGGTGGAGTGAAGAAACCCCACAGGTACAGGCCCGGTACCGTCGCTCTTCGTGAAATCCGTAGATACCAGAAGAGCACTGAGCTTTTGATCAGGAAACTGCCATTCCAGCGTCTGGTCAGAGAAATCGCCCAGGATTTCAAGACTGACCTCCGATTCCAGAGCTCAGCCGTCATGGCCCTCCAGGAGGCCAGCGAGGCCTACCTGGTTGGTCTCTTCGAGGATACCAACCTGTGCGCCATCCACGCCAAGCGTGTCACCATCATGCCAAAGGACATTCAGCTCGCTCGCCGTATTCGTGGA…	Histone H3c [Culex quinquefasciatus]	Histone H3c; K11253 histone H3 (A)	Histone H3 OS=Urechis caupo PE=1 SV=2	H3: 1-136	136	11.27	15.388	-0.604
evm.model.ctg1371.5	ScH3.1-19	Hic_asm_1	75223119	75223529	-	MARTKQTARKSTGGKAPRKQLATKAARKSAPATGGVKKPHRYRPGTVALREIRRYQKSTELLIRKLPFQRLVREIAQDFKTDLRFQSSAVMALQEASEAYLVGLFEDTNLCAIHAKRVTIMPKDIQLARRIRGERA	ATGGCGAGAACCAAGCAGACCGCAAGAAAATCCACCGGAGGCAAGGCTCCACGAAAGCAGCTGGCTACCAAGGCCGCTCGTAAGAGCGCACCAGCCACTGGTGGAGTGAAGAAACCCCACAGGTACAGGCCCGGTACCGTCGCTCTTCGTGAAATCCGTAGATACCAGAAGAGCACTGAGCTTTTGATCAGGAAACTGCCATTCCAGCGTCTGGTCAGAGAAATCGCCCAGGACTTCAAGACTGACCTCCGATTCCAGAGCTCAGCCGTCATGGCCCTCCAGGAGGCCAGCGAGGCCTACCTGGTTGGTCTCTTCGAGGATACCAACCTGTGCGCCATCCACGCCAAGCGTGTCACCATCATGCCAAAGGACATTCAGCTCGCTCGCCGTATTCGTGGA…	Histone H3c [Culex quinquefasciatus]	Histone H3c; K11253 histone H3 (A)	Histone H3 OS=Urechis caupo PE=1 SV=2	H3: 1-136	136	11.27	15.388	-0.604
evm.model.ctg2862.2	ScH3.2-1	ctg2862	60698	61141	-	MTETKQTARKSIGGKAPRKQLATKAARKSAPATGGVKKPHRYRPGTVAFHEIRRYQKTTELLIRKLPFQRLVREIAQDFKTDLRLQSSVVIALQDGLQKQTQTRSLSIIYLSIYPSIHPSIHASMHPCIHPSIHPSIYLYVSIHIKR	ATGACAGAAACTAAGCAGACTGCACGAAAATCCATCGGAGGAAAGGCTCCACGAAAGCAGCTGGCCACCAAGGCTGCTCGTAAGAGCGCACCAGCCACTGGTGGAGTGAAGAAACCACACAGGTACAGGCCCGGTACCGTCGCTTTTCATGAGATCCGTAGATACCAGAAGACCACTGAGCTGTTGATCAGGAAACTGCCATTCCAGCGTCTGGTCAGGGAAATCGCCCAGGACTTCAAGACTGATCTCCGATTACAGAGCTCTGTCGTCATTGCCCTTCAGGATGGCCTCCAGAAGCAAACGCAGACGCGTTCGTTATCTATCATCTATCTATCTATCTATCCATCCATCCATCCATCCATCCATGCATCCATGCATCCATGCATCCATCCATCCATC…	histone H3 [Mytilus californianus]	GK27312 gene product from transcript GK27312-RA; K11253 histone H3 (A)	Histone H3.1 OS=Rattus norvegicus PE=1 SV=3	H3: 1-95	147	10.78	16.7306	-0.448
evm.model.ctg3129.2	ScH3.2-2	ctg3129	40586	41038	+	MTETKQTARKSIGGKAPRKQLATKAARKSAPATGGVKKPHRYRPGTVAFHEIRRYQKTTELLIRKLPFQRLVREIAQDFKTDLQLQSSVVIALQDGLQKQTQTRSLSIIYLSIYPSIHPSIHPSMHASMHPSIHPSIHPSIHLSICIYTY	ATGACAGAAACTAAGCAGACTGCACGAAAATCCATCGGAGGAAAGGCTCCACGAAAGCAGCTGGCCACCAAGGCTGCTCGTAAGAGCGCACCAGCCACTGGTGGAGTGAAGAAACCACACAGGTACAGGCCCGGTACCGTCGCTTTTCATGAGATCCGTAGATACCAGAAGACCACTGAGCTGTTGATCAGGAAACTGCCATTCCAGCGTCTGGTCAGGGAAATCGCCCAGGACTTCAAGACTGATCTCCAATTACAGAGCTCTGTCGTCATTGCCCTTCAGGATGGCCTCCAGAAGCAAACGCAGACGCGTTCGTTATCTATCATCTATCTATCTATCTATCCATCCATCCATCCATCCATCCATCCATCCATGCATGCATCCATGCATCCATCCATC…	histone H3 [Mytilus californianus]	GK27312 gene product from transcript GK27312-RA; K11253 histone H3 (A)	Histone H3.1 OS=Rattus norvegicus PE=1 SV=3	H3: 1-95	150	10.5	16.9598	-0.439
evm.model.ctg4932.3	ScH3.2-3	ctg4932	8333	8615	+	MTETKQTARKSIGGKAPRKQLATKAARKSAPATGGVNKQHRYRPGTVALLEIRRYQKSTELLIRKLPFQRLVREIAQDFKTDLRLQSSVVIALQ	ATGACAGAAACCAAGCAGACTGCACGAAAATCCATCGGAGGAAAGGCTCCTCGAAAGCAGCTGGCCACCAAGGCCGCTCGTAAGAGCGCACCAGCCACTGGTGGAGTGAATAAACAACACAGGTACAGGCCCGGTACCGTCGCTCTTCTTGAAATCCGTAGATACCAGAAGAGCACTGAGCTGTTGATCAGGAAACTGCCATTCCAGCGTCTGGTCAGGGAAATCGCCCAGGACTTCAAGACTGATCTCCGATTGCAGAGCTCTGTCGTCATTGCCCTTCAGG	histone H3 [Bos taurus]	GF28200 gene product from transcript GF28200-RA; K11253 histone H3 (A)	Histone H3 OS=Urechis caupo PE=1 SV=2	H3: 1-94	94	11.45	10.6144	-0.615
evm.model.ctg4932.1	ScH3.2-4	ctg4932	11225	13321	+	MTETKQTARKSIGGKAPRKQLATKAARKSAPATGGVNKPHRYRPGTVALLEIRRYQKSTELLIRKLQFQRLVREIAQDFKTDLRFQSSVVNGLQDGLQKQTQTLPNEALYNRRNNLDSMLIVDWKPNTLGNPHAINITL	ATGACAGAAACCAAGCAGACTGCACGAAAATCCATCGGAGGAAAGGCTCCTCGAAAGCAGCTGGCCACCAAGGCCGCTCGTAAGAGCGCACCAGCCACTGGTGGAGTGAATAAACCACACAGATACAGGCCCGGTACCGTCGCTCTTCTTGAGATCCGTAGATACCAGAAGAGCACTGAGCTGTTGATCAGGAAACTGCAATTCCAGCGTCTGGTCAGGGAAATCGCCCAGGACTTCAAGACTGATCTCCGATTCCAGAGCTCTGTCGTCAATGGCCTTCAGGATGGCCTCCAGAAGCAAACGCAAACGCTCCCAAATGAGGCACTGTATAACAGGCGAAATAATCTAGATTCAATGTTAATAGTGGACTGGAAACCAAATACACTAGGCAACCCTCAC…	histone 3, partial [Potamonautes rayboldi]	GM16403 gene product from transcript GM16403-RA; K11253 histone H3 (A)	Histone H3.1 OS=Rattus norvegicus PE=1 SV=3	H3: 1-95	139	10.85	15.7492	-0.717
evm.model.ctg4932.2	ScH3.2-5	ctg4932	15193	15502	+	MTETKQTARKSIGGKAPRKQLATKAARKSAPATGGVNKPHRYRPGTVALLEIRRYQKSTELLIRKLQFQRLVREIAQDFKTDLRLQSSVVIGLQDGLQKQTQT	ATGACAGAAACCAAGCAGACTGCACGAAAATCCATCGGAGGAAAGGCTCCTCGAAAGCAGCTGGCCACCAAGGCCGCTCGTAAGAGCGCACCAGCCACTGGTGGAGTGAATAAACCACACAGATACAGGCCCGGTACCGTCGCTCTTCTTGAGATCCGTAGATACCAGAAGAGCACTGAGCTGTTGATCAGGAAACTGCAATTCCAGCGTCTGGTCAGGGAAATCGCCCAGGACTTCAAGACTGATCTCCGATTGCAGAGCTCTGTCGTCATTGGCCTTCAGGATGGCCTCCAGAAGCAAACGCAAACGC	histone 3, partial [Potamonautes rayboldi]	GM16403 gene product from transcript GM16403-RA; K11253 histone H3 (A)	Histone H3.1 OS=Rattus norvegicus PE=1 SV=3	H3: 1-95	103	11.26	11.6005	-0.737
evm.model.ctg7145.3	ScH3.3	ctg7145	7055	7519	+	MPAKGVASKGSKKAATKAKAARSTDKKKKRRRRESYSIYIYKVLKQVHPDTGGVKKPHRYRPGTVALREIRRYQKSTELLIRKLPFQRLVREIAQDFKTDLRFQSSAVMALQEASEAYLVGLFEDTNLCAIHAKRVTIMPKDIQLARRIRGERA	atgccagctaaaggagttgcaagcaaggggtcgaagaaggccgccactaaggctaaggccgcccgttccaccgacaagaagaagaagaggaggaggagggaatcctactctatctacatctacaaagttttgaagcaggtgcacccagacactggtggagtgaagaaaccccacaggtacaggcccggtaccgtcgctcttcgtgaaatccgtagataccagaagagcactgagcttttgatcaggaaactgccattccagcgtctggtcagagaaatcgcccaggacttcaagactgacctccgattccagagctcagccgtcatggccctccaggaggccagcgaggcctacctggttggtctcttcgaggataccaacctgtgcgccatccacgcc…	histone H3-like [Anser cygnoides domesticus]	histone H3, putative; K11253 histone H3 (A)	Histone H3 OS=Urechis caupo PE=1 SV=2	H3: 42-154	154	10.73	17.6827	-0.684
evm.model.ctg4484.23	ScH3.4	ctg4484	31133	31558	+	MARTKQTARKSTGGKAPRKQLATKAARKSAPATGGVKKPHRYRPGTVALREIRRYQKSTELLIRKLPFQRLVREIAQDFKTDLRFQSSAVMALQEASEAYLVGLFEDTNLCAIHAKRVTIMPKDIQLTTRLETMSPLSTLT	atggcgagaaccaagcagactgcacgaaaatccaccggaggaaaggctccccgcaagcagctggccactaaggccgctcgtaagagcgcaccagccaccggtggagtgaagaagccccacaggtacaggcccggtaccgtcgctcttcgtgagattcgtagataccagaagagcactgagctgttgatcaggaaactgccattccagcgtctggtcagggaaatcgcccaggacttcaagacagaccttcgcttccagagctcagccgtcatggcccttcaggaggccagcgaggcctacctggttggagacaatgtcaccgctatcaacgctcacctgaagcttgccctgaaggcaggttgcaagagtggcgcccttaagcaggctaagggaaccggt…	histone H3, partial [Conothele sp. MY2070]	histone H3-like; K11253 histone H3 (A)	Histone H3 OS=Urechis caupo PE=1 SV=2	H3: 1-131	141	11.26	23.5091	-0.494
evm.model.ctg4484.6	ScH4-1	ctg4484	6942	7253	+	MSGRGKGGKGLGKGGAKRHRKVLRDNIQGITKPAIRRLARRGGVKRISGLIYEETRGVLKVFLENVIRDAVTYTEHAKRKTVTAMDVVYALKRQGRTLYGFGG	atgtctggtcgcggtaaaggaggaaaaggtctaggaaaggggggcgctaagcgtcaccgaaaggtcttgagagataacatccagggtatcaccaagccagctatccgccgtcttgcccgccgaggtggtgtgaagagaatttctggcctgatctacgaagagacccgtggggttcttaaggttttccttgagaacgttatccgtgatgccgtcacctacaccgagcacgctaagaggaagaccgtcactgccatggacgttgtctacgccctgaagagacaaggcaggaccctgtacggattcggcggttaa	Histone H4 [Larimichthys crocea]	histone H4-like; K11254 histone H4 (A)	Histone H4 OS=Xenopus tropicalis GN=TGas006m08.1 PE=3 SV=1	H4: 1-103	103	11.36	11.3673	-0.521
evm.model.ctg4484.7	ScH4-2	ctg4484	8383	8694	+	MSGRGKGGKGLGKGGAKRHRKVLRDNIQGITKPAIRRLARRGGVKRISGLIYEETRGVLKVFLENVIRDAVTYTEHAKRKTVTAMDVVYALKRQGRTLYGFGG	ATGTCTGGTCGCGGTAAAGGAGGAAAAGGTCTAGGAAAGGGGGGCGCTAAGCGTCACCGAAAGGTCTTGAGAGATAACATCCAGGGTATCACCAAGCCAGCTATCCGCCGTCTTGCCCGCCGAGGTGGTGTGAAGAGAATTTCTGGCCTGATCTACGAAGAGACCCGTGGGGTTCTTAAGGTTTTCCTTGAGAACGTTATCCGTGATGCCGTCACCTACACCGAGCACGCTAAGAGGAAGACCGTCACTGCCATGGACGTTGTCTACGCCCTGAAGAGACAAGGCAGGACCCTGTACGGATTCGGCGGTTAA	Histone H4 [Larimichthys crocea]	histone H4-like; K11254 histone H4 (A)	Histone H4 OS=Xenopus tropicalis GN=TGas006m08.1 PE=3 SV=1	H4: 1-103	103	11.36	11.3673	-0.521
evm.model.ctg4484.25	ScH4-3	ctg4484	34937	35248	+	MSGRGKGGKGLGKGGAKRHRKVLRDNIQGITKPAIRRLARRGGVKRISGLIYEETRGVLKVFLENVIRDAVTYTEHAKRKTVTAMDVVYALKRQGRTLYGFGG	atgtctggtcgcggtaaaggaggaaaaggtctaggaaaggggggcgctaagcgtcaccgaaaggtcttgagagataacatccagggtatcaccaagccagctatccgccgtcttgcccgccgaggtggtgtgaagagaatttctggcctgatctacgaagagacccgtggggttcttaaggttttccttgagaacgttatccgtgatgccgtcacctacaccgagcacgctaagaggaagaccgtcactgccatggacgttgtctacgccctgaagagacaaggcaggaccctgtacggattcggcggttaa	Histone H4 [Larimichthys crocea]	histone H4-like; K11254 histone H4 (A)	Histone H4 OS=Xenopus tropicalis GN=TGas006m08.1 PE=3 SV=1	H4: 1-103	103	11.36	11.3673	-0.521
evm.model.ctg5055.2	ScH4-4	ctg5055	1399	1710	+	MSGRGKGGKGLGKGGAKRHRKVLRDNIQGITKPAIRRLARRGGVKRISGLIYEETRGVLKVFLENVIRDAVTYTEHAKRKTVTAMDVVYALKRQGRTLYGFGG	atgtctggacgcggcaaaggaggaaaaggtctaggaaaggggggcgctaagcgtcaccgaaaagtcctgagagataacatccagggtatcaccaagccagctatccgccgtcttgcccgccgaggtggtgtgaagagaatctcaggtctcatctacgaagagacccgtggtgtgctaaaggttttcttggagaacgtcattcgtgatgccgtcacctacaccgagcacgccaagaggaagaccgtgactgccatggacgttgtctacgccctgaagaggcaaggcagaactctgtacggattcggcggttaa	Histone H4 [Larimichthys crocea]	histone H4-like; K11254 histone H4 (A)	Histone H4 OS=Xenopus tropicalis GN=TGas006m08.1 PE=3 SV=1	H4: 1-103	103	11.36	11.3673	-0.521
evm.model.ctg5605.1	ScH4-5	ctg5605	1001	1312	+	MSGRGKGGKGLGKGGAKRHRKVLRDNIQGITKPAIRRLARRGGVKRISGLIYEETRGVLKVFLENVIRDAVTYTEHAKRKTVTAMDVVYALKRQGRTLYGFGG	ATGTCTGGACGCGGCAAAGGAGGAAAAGGTCTAGGAAAGGGGGGCGCTAAGCGTCACCGAAAAGTCCTGAGAGATAACATCCAGGGTATCACCAAGCCAGCTATCCGCCGTCTTGCCCGCCGAGGTGGTGTGAAGAGAATCTCAGGTCTCATCTACGAAGAGACCCGTGGTGTGCTAAAGGTTTTCTTGGAGAACGTCATTCGTGATGCCGTCACCTACACCGAGCACGCCAAGAGGAAGACCGTGACTGCCATGGACGTTGTCTACGCCCTGAAGAGGCAAGGCAGAACTCTGTACGGATTCGGCGGTTAA	Histone H4 [Larimichthys crocea]	histone H4-like; K11254 histone H4 (A)	Histone H4 OS=Xenopus tropicalis GN=TGas006m08.1 PE=3 SV=1	H4: 1-103	103	11.36	11.3673	-0.521
evm.model.ctg5605.6	ScH4-6	ctg5605	7652	7963	+	MSGRGKGGKGLGKGGAKRHRKVLRDNIQGITKPAIRRLARRGGVKRISGLIYEETRGVLKVFLENVIRDAVTYTEHAKRKTVTAMDVVYALKRQGRTLYGFGG	ATGTCTGGACGCGGCAAAGGAGGAAAAGGTCTAGGAAAGGGGGGCGCTAAGCGTCACCGAAAAGTCCTGAGAGATAACATCCAGGGTATCACCAAGCCAGCTATCCGCCGTCTTGCCCGCCGAGGTGGTGTGAAGAGAATCTCAGGTCTCATCTACGAAGAGACCCGTGGTGTGCTAAAGGTTTTCTTGGAGAACGTCATTCGTGATGCCGTCACCTACACCGAGCACGCCAAGAGGAAGACCGTGACTGCCATGGACGTTGTCTACGCCCTGAAGAGGCAAGGCAGAACTCTGTACGGATTCGGCGGTTAA	Histone H4 [Larimichthys crocea]	histone H4-like; K11254 histone H4 (A)	Histone H4 OS=Xenopus tropicalis GN=TGas006m08.1 PE=3 SV=1	H4: 1-103	103	11.36	11.3673	-0.521
evm.model.ctg5605.11	ScH4-7	ctg5605	14310	14621	+	MSGRGKGGKGLGKGGAKRHRKVLRDNIQGITKPAIRRLARRGGVKRISGLIYEETRGVLKVFLENVIRDAVTYTEHAKRKTVTAMDVVYALKRQGRTLYGFGG	ATGTCTGGACGCGGCAAAGGAGGAAAAGGTCTAGGAAAGGGGGGCGCTAAGCGTCACCGAAAAGTCCTGAGAGATAACATCCAGGGTATCACCAAGCCAGCTATCCGCCGTCTTGCCCGCCGAGGTGGTGTGAAGAGAATCTCAGGTCTCATCTACGAAGAGACCCGTGGTGTGCTAAAGGTTTTCTTGGAGAACGTCATTCGTGATGCCGTCACCTACACCGAGCACGCCAAGAGGAAGACCGTGACTGCCATGGACGTTGTCTACGCCCTGAAGAGGCAAGGCAGAACTCTGTACGGATTCGGCGGTTAA	Histone H4 [Larimichthys crocea]	histone H4-like; K11254 histone H4 (A)	Histone H4 OS=Xenopus tropicalis GN=TGas006m08.1 PE=3 SV=1	H4: 1-103	103	11.36	11.3673	-0.521
evm.model.ctg5749.9	ScH4-8	ctg5749	14122	14433	-	MSGRGKGGKGLGKGGAKRHRKVLRDNIQGITKPAIRRLARRGGVKRISGLIYEETRGVLKVFLENVIRDAVTYTEHAKRKTVTAMDVVYALKRQGRTLYGFGG	atgtctggtcgcggtaaaggaggaaaaggtctaggaaaggggggcgctaagcgtcaccgaaaggtcttgagagataacatccagggtatcaccaagccagctatccgccgtcttgcccgccgaggtggtgtgaagagaatttctggcctgatctacgaagagacccgtggggttcttaaggttttccttgagaacgttatccgtgatgccgtcacctacaccgagcacgctaagaggaagaccgtcactgccatggacgttgtctacgccctgaagagacaaggcaggaccctgtacggattcggcggttaa	Histone H4 [Larimichthys crocea]	histone H4-like; K11254 histone H4 (A)	Histone H4 OS=Xenopus tropicalis GN=TGas006m08.1 PE=3 SV=1	H4: 1-103	103	11.36	11.3673	-0.521
evm.model.ctg5749.10	ScH4-9	ctg5749	15587	15898	-	MSGRGKGGKGLGKGGAKRHRKVLRDNIQGITKPAIRRLARRGGVKRISGLIYEETRGVLKVFLENVIRDAVTYTEHAKRKTVTAMDVVYALKRQGRTLYGFGG	atgtctggtcgcggtaaaggaggaaaaggtctaggaaaggggggcgctaagcgtcaccgaaaggtcttgagagataacatccagggtatcaccaagccagctatccgccgtcttgcccgccgaggtggtgtgaagagaatttctggcctgatctacgaagagacccgtggggttcttaaggttttccttgagaacgttatccgtgatgccgtcacctacaccgagcacgctaagaggaagaccgtcactgccatggacgttgtctacgccctgaagagacaaggcaggaccctgtacggattcggcggttaa	Histone H4 [Larimichthys crocea]	histone H4-like; K11254 histone H4 (A)	Histone H4 OS=Xenopus tropicalis GN=TGas006m08.1 PE=3 SV=1	H4: 1-103	103	11.36	11.3673	-0.521
evm.model.ctg6665.23	ScH4-10	ctg6665	35448	35759	-	MSGRGKGGKGLGKGGAKRHRKVLRDNIQGITKPAIRRLARRGGVKRISGLIYEETRGVLKVFLENVIRDAVTYTEHAKRKTVTAMDVVYALKRQGRTLYGFGG	atgtctggtcgcggtaaaggaggaaaaggtctaggaaaggggggcgctaagcgtcaccgaaaggtcttgagagataacatccagggtatcaccaagccagctatccgccgtcttgcccgccgaggtggtgtgaagagaatttctggcctgatctacgaagagacccgtggggttcttaaggttttccttgagaacgttatccgtgatgccgtcacctacaccgagcacgctaagaggaagaccgtcactgccatggacgttgtctacgccctgaagagacaaggcaggaccctgtacggattcggcggttaa	Histone H4 [Larimichthys crocea]	histone H4-like; K11254 histone H4 (A)	Histone H4 OS=Xenopus tropicalis GN=TGas006m08.1 PE=3 SV=1	H4: 1-103	103	11.36	11.3673	-0.521
evm.model.ctg6665.24	ScH4-11	ctg6665	36888	37199	-	MSGRGKGGKGLGKGGAKRHRKVLRDNIQGITKPAIRRLARRGGVKRISGLIYEETRGVLKVFLENVIRDAVTYTEHAKRKTVTAMDVVYALKRQGRTLYGFGG	atgtctggtcgcggtaaaggaggaaaaggtctaggaaaggggggcgctaagcgtcaccgaaaggtcttgagagataacatccagggtatcaccaagccagctatccgccgtcttgcccgccgaggtggtgtgaagagaatttctggcctgatctacgaagagacccgtggggttcttaaggttttccttgagaacgttatccgtgatgccgtcacctacaccgagcacgctaagaggaagaccgtcactgccatggacgttgtctacgccctgaagagacaaggcaggaccctgtacggattcggcggttaa	Histone H4 [Larimichthys crocea]	histone H4-like; K11254 histone H4 (A)	Histone H4 OS=Xenopus tropicalis GN=TGas006m08.1 PE=3 SV=1	H4: 1-103	103	11.36	11.3673	-0.521
evm.model.ctg6665.31	ScH4-12	ctg6665	48960	49271	-	MSGRGKGGKGLGKGGAKRHRKVLRDNIQGITKPAIRRLARRGGVKRISGLIYEETRGVLKVFLENVIRDAVTYTEHAKRKTVTAMDVVYALKRQGRTLYGFGG	atgtctggtcgcggtaaaggaggaaaaggtctaggaaaggggggcgctaagcgtcaccgaaaggtcttgagagataacatccagggtatcaccaagccagctatccgccgtcttgcccgccgaggtggtgtgaagagaatttctggcctgatctacgaagagacccgtggggttcttaaggttttccttgagaacgttatccgtgatgccgtcacctacaccgagcacgctaagaggaagaccgtcactgccatggacgttgtctacgccctgaagagacaaggcaggaccctgtacggattcggcggttaa	Histone H4 [Larimichthys crocea]	histone H4-like; K11254 histone H4 (A)	Histone H4 OS=Xenopus tropicalis GN=TGas006m08.1 PE=3 SV=1	H4: 1-103	103	11.36	11.3673	-0.521
evm.model.ctg6665.32	ScH4-13	ctg6665	50139	50450	-	MSGRGKGGKGLGKGGAKRHRKVLRDNIQGITKPAIRRLARRGGVKRISGLIYEETRGVLKVFLENVIRDAVTYTEHAKRKTVTAMDVVYALKRQGRTLYGFGG	atgtctggtcgcggtaaaggaggaaaaggtctaggaaaggggggcgctaagcgtcaccgaaaggtcttgagagataacatccagggtatcaccaagccagctatccgccgtcttgcccgccgaggtggtgtgaagagaatttctggcctgatctacgaagagacccgtggggttcttaaggttttccttgagaacgttatccgtgatgccgtcacctacaccgagcacgctaagaggaagaccgtcactgccatggacgttgtctacgccctgaagagacaaggcaggaccctgtacggattcggcggttaa	Histone H4 [Larimichthys crocea]	histone H4-like; K11254 histone H4 (A)	Histone H4 OS=Xenopus tropicalis GN=TGas006m08.1 PE=3 SV=1	H4: 1-103	103	11.36	11.3673	-0.521
evm.model.ctg7342.19	ScH4-14	ctg7342	31802	32113	+	MSGRGKGGKGLGKGGAKRHRKVLRDNIQGITKPAIRRLARRGGVKRISGLIYEETRGVLKVFLENVIRDAVTYTEHAKRKTVTAMDVVYALKRQGRTLYGFGG	atgtctggtcgcggtaaaggaggaaaaggtctaggaaaggggggcgctaagcgtcaccgaaaggtcttgagagataacatccagggtatcaccaagccagctatccgccgtcttgcccgccgaggtggtgtgaagagaatttctggcctgatctacgaagagacccgtggggttcttaaggttttccttgagaacgttatccgtgatgccgtcacctacaccgagcacgctaagaggaagaccgtcactgccatggacgttgtctacgccctgaagagacaaggcaggaccctgtacggattcggcggttaa	Histone H4 [Larimichthys crocea]	histone H4-like; K11254 histone H4 (A)	Histone H4 OS=Xenopus tropicalis GN=TGas006m08.1 PE=3 SV=1	H4: 1-103	103	11.36	11.3673	-0.521
evm.model.ctg8547.5	ScH4-15	ctg8547	7697	8008	-	MSGRGKGGKGLGKGGAKRHRKVLRDNIQGITKPAIRRLARRGGVKRISGLIYEETRGVLKVFLENVIRDAVTYTEHAKRKTVTAMDVVYALKRQGRTLYGFGG	atgtctggacgcggcaaaggaggaaaaggtctaggaaaggggggcgctaagcgtcaccgaaaagtcctgagagataacatccagggtatcaccaagccagctatccgccgtcttgcccgccgaggtggtgtgaagagaatctcaggtctcatctacgaagagacccgtggtgtgctaaaggttttcttggagaacgtcattcgtgatgccgtcacctacaccgagcacgccaagaggaagaccgtgactgccatggacgttgtctacgccctgaagaggcaaggcagaactctgtacggattcggcggttaa	Histone H4 [Larimichthys crocea]	histone H4-like; K11254 histone H4 (A)	Histone H4 OS=Xenopus tropicalis GN=TGas006m08.1 PE=3 SV=1	H4: 1-103	103	11.36	11.3673	-0.521
evm.model.ctg8584.2	ScH4-16	ctg8584	919	1230	-	MSGRGKGGKGLGKGGAKRHRKVLRDNIQGITKPAIRRLARRGGVKRISGLIYEETRGVLKVFLENVIRDAVTYTEHAKRKTVTAMDVVYALKRQGRTLYGFGG	ATGTCTGGACGCGGCAAAGGAGGAAAAGGTCTAGGAAAGGGGGGCGCTAAGCGTCACCGAAAAGTCCTGAGAGATAACATCCAGGGTATCACCAAGCCAGCTATCCGCCGTCTTGCCCGCCGAGGTGGTGTGAAGAGAATCTCAGGTCTCATCTACGAAGAGACCCGTGGTGTGCTAAAGGTTTTCTTGGAGAACGTCATTCGTGATGCCGTCACCTACACCGAGCACGCCAAGAGGAAGACCGTGACTGCCATGGACGTTGTCTACGCCCTGAAGAGGCAAGGCAGAACTCTGTACGGATTCGGCGGTTAA	Histone H4 [Larimichthys crocea]	histone H4-like; K11254 histone H4 (A)	Histone H4 OS=Xenopus tropicalis GN=TGas006m08.1 PE=3 SV=1	H4: 1-103	103	11.36	11.3673	-0.521
evm.model.ctg10509.2	ScH4-17	ctg10509	8142	8453	+	MSGRGKGGKGLGKGGAKRHRKVLRDNIQGITKPAIRRLARRGGVKRISGLIYEETRGVLKVFLENVIRDAVTYTEHAKRKTVTAMDVVYALKRQGRTLYGFGG	ATGTCTGGACGCGGCAAAGGAGGAAAAGGTCTAGGAAAGGGGGGCGCTAAGCGTCACCGAAAAGTCCTGAGAGATAACATCCAGGGTATCACCAAGCCAGCTATCCGCCGTCTTGCCCGCCGAGGTGGTGTGAAGAGAATCTCAGGTCTCATCTACGAAGAGACCCGTGGTGTGCTAAAGGTTTTCTTGGAGAACGTCATTCGTGATGCCGTCACCTACACCGAGCACGCCAAGAGGAAGACCGTGACTGCCATGGACGTTGTCTACGCCCTGAAGAGGCAAGGCAGAACTCTGTACGGATTCGGCGGTTAA	Histone H4 [Larimichthys crocea]	histone H4-like; K11254 histone H4 (A)	Histone H4 OS=Xenopus tropicalis GN=TGas006m08.1 PE=3 SV=1	H4: 1-103	103	11.36	11.3673	-0.521
evm.model.ctg10813.1	ScH4-18	ctg10813	245	556	-	MSGRGKGGKGLGKGGAKRHRKVLRDNIQGITKPAIRRLARRGGVKRISGLIYEETRGVLKVFLENVIRDAVTYTEHAKRKTVTAMDVVYALKRQGRTLYGFGG	ATGTCTGGACGCGGCAAAGGAGGAAAAGGTCTAGGAAAGGGGGGCGCTAAGCGTCACCGAAAAGTCCTGAGAGATAACATCCAGGGTATCACCAAGCCAGCTATCCGCCGTCTTGCCCGCCGAGGTGGTGTGAAGAGAATCTCAGGTCTCATCTACGAAGAGACCCGTGGTGTGCTAAAGGTTTTCTTGGAGAACGTCATTCGTGATGCCGTCACCTACACCGAGCACGCCAAGAGGAAGACCGTGACTGCCATGGACGTTGTCTACGCCCTGAAGAGGCAAGGCAGAACTCTGTACGGATTCGGCGGTTAA	Histone H4 [Larimichthys crocea]	histone H4-like; K11254 histone H4 (A)	Histone H4 OS=Xenopus tropicalis GN=TGas006m08.1 PE=3 SV=1	H4: 1-103	103	11.36	11.3673	-0.521
evm.model.ctg10813.6	ScH4-19	ctg10813	6916	7227	-	MSGRGKGGKGLGKGGAKRHRKVLRDNIQGITKPAIRRLARRGGVKRISGLIYEETRGVLKVFLENVIRDAVTYTEHAKRKTVTAMDVVYALKRQGRTLYGFGG	ATGTCTGGACGCGGCAAAGGAGGAAAAGGTCTAGGAAAGGGGGGCGCTAAGCGTCACCGAAAAGTCCTGAGAGATAACATCCAGGGTATCACCAAGCCAGCTATCCGCCGTCTTGCCCGCCGAGGTGGTGTGAAGAGAATCTCAGGTCTCATCTACGAAGAGACCCGTGGTGTGCTAAAGGTTTTCTTGGAGAACGTCATTCGTGATGCCGTCACCTACACCGAGCACGCCAAGAGGAAGACCGTGACTGCCATGGACGTTGTCTACGCCCTGAAGAGGCAAGGCAGAACTCTGTACGGATTCGGCGGTTAA	Histone H4 [Larimichthys crocea]	histone H4-like; K11254 histone H4 (A)	Histone H4 OS=Xenopus tropicalis GN=TGas006m08.1 PE=3 SV=1	H4: 1-103	103	11.36	11.3673	-0.521
evm.model.ctg1356.8	ScH4-20	Hic_asm_1	74152176	74152487	-	MSGRGKGGKGLGKGGAKRHRKVLRDNIQGITKPAIRRLARRGGVKRISGLIYEETRGVLKVFLENVIRDAVTYTEHAKRKTVTAMDVVYALKRQGRTLYGFGG	ATGTCTGGACGCGGCAAAGGAGGAAAAGGTCTAGGAAAGGGGGGCGCTAAGCGTCACCGAAAAGTCCTGAGAGATAACATCCAGGGTATCACCAAGCCAGCTATCCGCCGTCTTGCCCGCCGAGGTGGTGTGAAGAGAATCTCAGGTCTCATCTACGAAGAGACCCGTGGTGTGCTAAAGGTTTTCTTGGAGAACGTCATTCGTGATGCCGTCACCTACACCGAGCACGCCAAGAGGAAGACCGTGACTGCCATGGACGTTGTCTACGCCCTGAAGAGGCAAGGCAGAACTCTGTACGGATTCGGCGGTTAA	Histone H4 [Larimichthys crocea]	histone H4-like; K11254 histone H4 (A)	Histone H4 OS=Xenopus tropicalis GN=TGas006m08.1 PE=3 SV=1	H4: 1-103	103	11.36	11.3673	-0.521
evm.model.ctg1311.3	ScH4-21	Hic_asm_1	74833604	74833915	+	MSGRGKGGKGLGKGGAKRHRKVLRDNIQGITKPAIRRLARRGGVKRISGLIYEETRGVLKVFLENVIRDAVTYTEHAKRKTVTAMDVVYALKRQGRTLYGFGG	ATGTCTGGACGCGGCAAAGGAGGAAAAGGTCTAGGAAAGGGGGGCGCTAAGCGTCACCGAAAAGTCCTGAGAGATAACATCCAGGGTATCACCAAGCCAGCTATCCGCCGTCTTGCCCGCCGAGGTGGTGTGAAGAGAATCTCAGGTCTCATCTACGAAGAGACCCGTGGTGTGCTAAAGGTTTTCTTGGAGAACGTCATTCGTGATGCCGTCACCTACACCGAGCACGCCAAGAGGAAGACCGTGACTGCCATGGACGTTGTCTACGCCCTGAAGAGGCAAGGCAGAACTCTGTACGGATTCGGCGGTTAA	Histone H4 [Larimichthys crocea]	histone H4-like; K11254 histone H4 (A)	Histone H4 OS=Xenopus tropicalis GN=TGas006m08.1 PE=3 SV=1	H4: 1-103	103	11.36	11.3673	-0.521
evm.model.ctg1371.4	ScH4-22	Hic_asm_1	75222000	75222311	-	MSGRGKGGKGLGKGGAKRHRKVLRDNIQGITKPAIRRLARRGGVKRISGLIYEETRGVLKVFLENVIRDAVTYTEHAKRKTVTAMDVVYALKRQGRTLYGFGG	ATGTCTGGACGCGGCAAAGGAGGAAAAGGTCTAGGAAAGGGGGGCGCTAAGCGTCACCGAAAAGTCCTGAGAGATAACATCCAGGGTATCACCAAGCCAGCTATCCGCCGTCTTGCCCGCCGAGGTGGTGTGAAGAGAATCTCAGGTCTCATCTACGAAGAGACCCGTGGTGTGCTAAAGGTTTTCTTGGAGAACGTCATTCGTGATGCCGTCACCTACACCGAGCACGCCAAGAGGAAGACCGTGACTGCCATGGACGTTGTCTACGCCCTGAAGAGGCAAGGCAGAACTCTGTACGGATTCGGCGGTTAA	Histone H4 [Larimichthys crocea]	histone H4-like; K11254 histone H4 (A)	Histone H4 OS=Xenopus tropicalis GN=TGas006m08.1 PE=3 SV=1	H4: 1-103	103	11.36	11.3673	-0.521
evm.model.ctg1371.9	ScH4-23	Hic_asm_1	75228665	75228976	-	MSGRGKGGKGLGKGGAKRHRKVLRDNIQGITKPAIRRLARRGGVKRISGLIYEETRGVLKVFLENVIRDAVTYTEHAKRKTVTAMDVVYALKRQGRTLYGFGG	ATGTCTGGACGCGGCAAAGGAGGAAAAGGTCTAGGAAAGGGGGGCGCTAAGCGTCACCGAAAAGTCCTGAGAGATAACATCCAGGGTATCACCAAGCCAGCTATCCGCCGTCTTGCCCGCCGAGGTGGTGTGAAGAGAATCTCAGGTCTCATCTACGAAGAGACCCGTGGTGTGCTAAAGGTTTTCTTGGAGAACGTCATTCGTGATGCCGTCACCTACACCGAGCACGCCAAGAGGAAGACCGTGACTGCCATGGACGTTGTCTACGCCCTGAAGAGGCAAGGCAGAACTCTGTACGGATTCGGCGGTTAA	Histone H4 [Larimichthys crocea]	histone H4-like; K11254 histone H4 (A)	Histone H4 OS=Xenopus tropicalis GN=TGas006m08.1 PE=3 SV=1	H4: 1-103	103	11.36	11.3673	-0.521
