# Supplementary material for: Genome-Wide Characterization and Analysis of Expression of the Histone Gene Family in Razor Clam, Sinonovacula constricta
Source: MDPI journal article supplement (doi:10.3390/fishes7010005), 2021-12-25
Supplement: s1 [file s1 › Supplementary Table S2.xlsx]

## Sheet: Sheet1
Table S2: Comparison of the genomic sequences between duplicated genes
Gene name	ScH1.4-1	ScH1.4-2	ScH2B.1-8	ScH2B.1-9	ScH2A.1-1	ScH2A.1-2	ScH2A.1-12	ScH2A.1-13	ScH3.2-3	ScH3.2-4	ScH3.2-5
ScH1.4-1	100	100
ScH1.4-2	100	100
ScH2B.1-8			100	100
ScH2B.1-9			100	100
ScH2A.1-1					100	100	100	100
ScH2A.1-2					100	100	100	100
ScH2A.1-12					100	100	100	100
ScH2A.1-13					100	100	100	100
ScH3.2-3									100	94.68	96.81
ScH3.2-4									94.68	100	98.06
ScH3.2-5									96.81	98.06	100
