# Supplementary material for: Genome-Wide Characterization and Analysis of Expression of the Histone Gene Family in Razor Clam, Sinonovacula constricta
Source: MDPI journal article supplement (doi:10.3390/fishes7010005), 2021-12-25
Supplement: s1 [file s1 › Supplementary Table S4.xls]

## Sheet: Sheet1
Table S4：Sequences of the 15 motif detected by MEME
motif1	EIRRYQKSTELLIRKLPFQRLVREIAQDF
motif2	KYIIYIYKVLKNVTPITAHLK
motif3	EEILEEAGNAARDNKRSTITPREIQLAVR
motif4	MTETKQTARKSIGGKAPRKQLATKAARKSAPATGGVKKPHRYRPGTVALL
motif5	ADVVVAPAPAKVKKAAKPKKPATHPKYSEMIAAAVGALKERGGSSRQAIL
motif6	QAKGTGASGSFKLGEKKKAAKKAKKPKKA
motif7	TDLRFQSSVVIALQDGLZKQT
motif8	GRGKGGKTKGKAKSRSSRAGLQFPVGRIHRLLRKGNYAERI
motif9	MSIMNSFVNDI
motif10	LLSSVTIAQGGVLPNIHPSLL
motif11	KTPSKKAASAKKAAKPKKAKTPKKAAKPAAKKATKSP
motif12	LYLAAGLEYLA
motif13	SMHPCIHPSIHPSIHLYICIH
motif14	NDEELN
motif15	RNNPDKFLIVCWKPNW
