# Supplementary material for: Genome-Wide Characterization and Analysis of Expression of the Histone Gene Family in Razor Clam, Sinonovacula constricta
Source: MDPI journal article supplement (doi:10.3390/fishes7010005), 2021-12-25
Supplement: s1 [file s1 › Supplementary Table S6.xlsx]

## Sheet: Sheet1
Table S6：FPKM values of the adult tissues. Largest values among tissues are colored by orange
Gene ID	Gill	Foot	Adductor muscle	Hepatopancreas	Mantle	Siphon
ScH1.1	0.31	0	0	0.43	1.08	0
ScH1.2	0.21	0.41	0	2.88	0	0
ScH1.0	236.83	193.05	91.13	86.92	154.36	229.79
ScH1oo	0.59	0.81	1.13	4.91	0.29	0
ScH2A.1	16	9.34	4.46	22.98	13.37	14.75
ScH2A.V	590.3	361.86	299.21	270.52	395.11	424.33
ScH2A.1macro	3.67	0.46	0.5	2.97	0.63	1.48
ScH2Asperm	3.23	6.13	16.87	16.69	7.08	4.39
ScH2B.1-1	0.39	0	0	1.52	0	0
ScH3.1-1	2.61	2.17	4.39	4.4	2.42	0.86
ScH3.2-1	0	0	0	0	0	0
ScH3.2-2	0	0.11	0	25.86	0	0
ScH3.2-3	558.79	422.67	318.75	259.1	341.4	400.45
ScH3.2-4	3.9	2.52	0.57	2.05	0.97	1.51
ScH3.4	2.66	0.2	0.77	0.2	0.72	0.89
ScH4-1	2.03	3.8	5.56	9.69	3.55	3.7
